# Supplementary material
Source: MDPI journal article supplement (https://www.mdpi.com/2312-7481/10/11/90)
Supplement: s1 [file s1]

## *Supplementary Materials*

### **Recent insights into magneto-structural properties of Co(II) dicyanamide coordination compounds**

Anna Świtlicka\*

Institute of Chemistry, University of Silesia, Szkolna 9, 40-006 Katowice, Poland

|                                                                                                  |    |
|--------------------------------------------------------------------------------------------------|----|
| Table S1. Magneto-structural data for mononuclear dca-Co(II) compounds. ....                     | 2  |
| Table S2. Shape values for mononuclear Co(II) complexes.....                                     | 5  |
| Table S3. Magneto-structural data for binuclear dca-Co(II) compounds.....                        | 7  |
| Table S4. Magneto-structural data for one-dimensional dca-Co(II) coordination polymers.          | 8  |
| Table S5. Magneto-structural data for two-dimensional dca-Co(II) coordination polymer            | 20 |
| Table S6. Magneto-structural data for three-dimensional dca-Co(II) coordination polymer<br>..... | 32 |

**Table S1.** Magneto-structural data for mononuclear dca-Co(II) compounds.

| Compound                                                                      | Co–N <sub>ligand</sub> [Å]           | Co–N <sub>DCA</sub> [Å] | Angles [°]             |                        | Co···Co [Å] | Magnetism                                                                                                                                                                                                                                                                                                                                                                                                                                                 | Ref  |
|-------------------------------------------------------------------------------|--------------------------------------|-------------------------|------------------------|------------------------|-------------|-----------------------------------------------------------------------------------------------------------------------------------------------------------------------------------------------------------------------------------------------------------------------------------------------------------------------------------------------------------------------------------------------------------------------------------------------------------|------|
|                                                                               |                                      |                         | Co–NC <sub>(dca)</sub> | C–N–C <sub>(dca)</sub> |             |                                                                                                                                                                                                                                                                                                                                                                                                                                                           |      |
| Monodentate organic ligand                                                    |                                      |                         |                        |                        |             |                                                                                                                                                                                                                                                                                                                                                                                                                                                           |      |
| [Co(bim) <sub>4</sub> (dca) <sub>2</sub> ]                                    | 2.1546(15)<br>2.1489(15)             | 2.1575(18)              | 155.32(18)             | 122.8(3)               | 9.686(2)    | <b>dc</b><br>λ <sub>M</sub> T = 3.06 cm <sup>3</sup> mol <sup>−1</sup> K at room temperature<br>λ <sub>M</sub> T = 1.76 cm <sup>3</sup> mol <sup>−1</sup> K at 2.0 K<br>α = 1.18<br>λ = −132.0 cm <sup>−1</sup><br>Δ = −416.3 cm <sup>−1</sup><br>TIP = 708.10 <sup>−6</sup> cm <sup>3</sup> mol <sup>−1</sup><br>with F = 7.5 · 10 <sup>−6</sup><br>D –<br><b>ac</b><br>τ <sub>0</sub> = 0.87 · 10 <sup>−6</sup> s<br>E = 7.74 cm <sup>−1</sup> at 1000G | [3]  |
| [Co(4bpo)(H <sub>2</sub> O) <sub>2</sub> (dca)]H <sub>2</sub> O               | 2.189<br>2.189<br>2.066<br>2.066     | 2.079<br>2.079          | 170.0                  | 124.3(3)               | 9.459       | undiscussed                                                                                                                                                                                                                                                                                                                                                                                                                                               | [9]  |
| [Co(NITpPy) <sub>2</sub> (H <sub>2</sub> O) <sub>2</sub> (dca) <sub>2</sub> ] | 2.069<br>2.069<br><br>2.167<br>2.167 | 2.117<br>2.117          | 155.1                  | 122.4(2)               | 7.187       | <b>dc</b><br>μ <sub>eff</sub> = 5.55 μ <sub>B</sub> room temperature<br>μ <sub>eff</sub> = 1.84 μ <sub>B</sub> at 2K<br>J = 4.53 cm <sup>−1</sup><br>g = 2.34<br>θ = 0.1 K<br>R = 6.68 · 10 <sup>−3</sup>                                                                                                                                                                                                                                                 | [10] |
| Bidentate organic ligand                                                      |                                      |                         |                        |                        |             |                                                                                                                                                                                                                                                                                                                                                                                                                                                           |      |
| [Co(H <sub>2</sub> biim) <sub>2</sub> (dca) <sub>2</sub> ]                    | 2.1435(12)                           | 2.1912(13)              | 118.82(10)             | 119.27(13)             | 7.162(1)    | <b>dc</b>                                                                                                                                                                                                                                                                                                                                                                                                                                                 | [1]  |

|                                                           |                                                                                                                            |                                                                                |                      |                                                    |                                                          |                                                                                                                                                                            |      |
|-----------------------------------------------------------|----------------------------------------------------------------------------------------------------------------------------|--------------------------------------------------------------------------------|----------------------|----------------------------------------------------|----------------------------------------------------------|----------------------------------------------------------------------------------------------------------------------------------------------------------------------------|------|
|                                                           | 2.1268(12)<br>2.1435(12)<br>2.1258(12)                                                                                     | 2.1912(13)                                                                     | 120.47(10)           |                                                    |                                                          | $\chi_T = 2.55 \text{ emuKmol}^{-2}$ room temperature<br>$g = 2.33$<br>$D = 23.3 \text{ cm}^{-1}$                                                                          |      |
| [Co(phen) <sub>2</sub> (dca) <sub>2</sub> ]<br>Crystal 1a | <b>193K</b><br>2.149(1)<br>2.147(1)<br>2.145(1)<br>2.173(2)<br><b>293K</b><br>2.142(2)<br>2.142(2)<br>2.141(2)<br>2.166(2) | <b>193K</b><br>2.093(2)<br>2.070(2)<br><br><b>293K</b><br>2.092(2)<br>2.066(2) | 173.8(1)<br>169.4(2) | 121.4(2)<br>122.4(2)                               | 8.6007(5)                                                | $g = 2.657$<br>$D = 99.1 \text{ cm}^{-1}$                                                                                                                                  | [7]  |
| [Co(phen) <sub>2</sub> (dca) <sub>2</sub> ]<br>Crystal 1b | 293K<br>2.139(3)<br>2.175(3)<br>2.132(3)<br>2.157(3)                                                                       | 293K<br>2.071(3)<br>2.069(3)                                                   | 171.3(3)<br>168.3(3) | 124.6(4)<br>125.8(4)                               | 8.2645(8)                                                | <b>dc</b><br>$\mu_{\text{eff}} = 4.94 \mu_B$ room temperature<br>$\mu_{\text{eff}} = 3.86 \mu_B$ at 2K<br>$g = 2.596$<br>$D = 84.8 \text{ cm}^{-1}$                        | [7]  |
| [Co(hdpa) <sub>2</sub> (dca) <sub>2</sub> ]               | 2.128(2)<br>2.158(2)<br>2.128(2)<br>2.158(2)                                                                               | 2.123(2)<br>2.123(2)                                                           | 173.5(2)             | 123.9(3)                                           | 8.062                                                    | <b>dc</b><br>$\mu_{\text{eff}} = 4.74 \mu_B$ at room temperature<br>$\mu_{\text{eff}} = 4.36 \mu_B$ at 85 K                                                                | [5]  |
| [Co(hmpH) <sub>2</sub> (dca) <sub>2</sub> ]               | 2.114<br>2.114<br>2.165<br>2.165                                                                                           | 2.077<br>2.077                                                                 | 162.1                | 120.4(2)                                           | 8.5828                                                   | undiscussed                                                                                                                                                                | [11] |
| <b>Tridentate organic ligand</b>                          |                                                                                                                            |                                                                                |                      |                                                    |                                                          |                                                                                                                                                                            |      |
| [Co(tppz) <sub>2</sub> ](dca) <sub>2</sub> ]              | <b>125K</b><br>N1 1.855(5)<br>N7 1.917(5)<br>N3 1.977(4)<br>N5 2.155(4)                                                    | –<br>uncoordinated<br>dca                                                      | –                    | <b>125K</b><br>120.5(6)<br><b>330K</b><br>123.2(7) | <b>125K</b><br>8.9361(7)<br><br><b>330K</b><br>9.0081(4) | <b>dc</b><br>$\chi_{MT} = 0.42 \text{ cm}^3 \text{ mol}^{-1} \text{K}$ in 1.9–170K<br>$\chi_{MT} = 0.675 \text{ cm}^3 \text{ mol}^{-1} \text{K}$ at 400K<br>SCO phenomenon | [4]  |

|                                           |                                                                                                                                        |                                                                                |                                                                                |                                                                                |                                                          |                                                                                                                                                                                                                                                                                                                                                                 |     |
|-------------------------------------------|----------------------------------------------------------------------------------------------------------------------------------------|--------------------------------------------------------------------------------|--------------------------------------------------------------------------------|--------------------------------------------------------------------------------|----------------------------------------------------------|-----------------------------------------------------------------------------------------------------------------------------------------------------------------------------------------------------------------------------------------------------------------------------------------------------------------------------------------------------------------|-----|
|                                           | <b>330K</b><br>N1 1.870(3)<br>N7 1.912(3)<br>N3 2.003(2)<br>N5 2.128(2)                                                                |                                                                                |                                                                                |                                                                                | Å                                                        |                                                                                                                                                                                                                                                                                                                                                                 |     |
| <b>Tetradentate organic ligand</b>        |                                                                                                                                        |                                                                                |                                                                                |                                                                                |                                                          |                                                                                                                                                                                                                                                                                                                                                                 |     |
| [Co(L <sup>1</sup> )(dca) <sub>2</sub> ]  | <b>100K</b><br>2.340(2)<br>1.920(2)<br>2.315(2)<br>1.909(2)<br><b>280K</b><br>N2 2.002(2)<br>N1 2.351(2)<br>N4 1.999(3)<br>N3 2.324(2) | <b>100K</b><br>1.927(2)<br>1.942(2)<br><br><b>280K</b><br>2.003(3)<br>2.024(3) | <b>100K</b><br>173.7(2)<br>166.5(2)<br><br><b>280K</b><br>170.4(3)<br>164.3(3) | <b>100K</b><br>117.8(2)<br>116.2(1)<br><br><b>280K</b><br>121.9(4)<br>118.0(3) | <b>100K</b><br>8.9101(6)<br><br><b>280K</b><br>9.0233(8) | χT = 2.55 cm <sup>3</sup> mol <sup>-1</sup> K at 400 K<br>χT in a range 0.52–0.49 cm <sup>3</sup> mol <sup>-1</sup><br>K at 80–20 K<br>SCO phenomenon                                                                                                                                                                                                           | [2] |
| [Co(12-TMC)(dca) <sub>2</sub> ]           | 2.273(1)<br>2.176(1)<br>2.283(1)<br>2.179(1)                                                                                           | 2.076(2)<br>2.106(1)                                                           | 160.0(1)<br>163.2(1)                                                           | 119.1(2)<br>123.6(2)                                                           | 8.174(1)                                                 | <b>dc</b><br>χT = 2.61 cm <sup>3</sup> mol <sup>-1</sup> K at 400K<br>χT = 1.65 cm <sup>3</sup> mol <sup>-1</sup> K at 2 K<br>D = 25.95(9) cm <sup>-1</sup><br>E = 0.12(3) cm <sup>-1</sup><br><b>ac</b><br>τ <sub>0</sub> = 1.14 · 10 <sup>-8</sup> s,<br>U <sub>eff</sub> = 27.31 cm <sup>-1</sup><br>C = 1.54 s <sup>-1</sup> K <sup>-4.19</sup><br>n = 4.19 | [6] |
| [Co(LC) <sub>2</sub> (dca) <sub>2</sub> ] | 2.1015(19)<br>2.1075(19)<br>2.2640(2)<br>2.2660(2)                                                                                     | 2.0590(2)<br>2.0850(2)                                                         | 152.2(3)<br>160.0(3)                                                           | 121.3(3)<br>121.1(3)                                                           | 8.9097(8)                                                | undiscussed                                                                                                                                                                                                                                                                                                                                                     | [8] |

**H<sub>2</sub>BiIm** = 2,2'-biimidazole; **L<sup>1</sup>**= N,N'-di-tertbutyl-2,11-diaza[3,3](2,6)pyridinophane; **bim** = 1-benzylimidazole; **tppz** = 2,3,5,6-tetrakis(2-pyridyl)pyrazine; **hdpa** = 2,2'-dipirydylamine; **TMC**- 1,4,7,10-tetramethyl-1,4,7,10-tetraazacyclododecane; **LC** = lidocaine; **hmpH**= 2-(hydroxymethyl)pyridine; **4-bpo**= 2,5-bis(4-pyridyl)-1,3,4-oxadiazole; **nitppy**= 2-(4'-pyridyl)-4,4,5,5-tetramethylimidazoline-1-oxyl-3-oxide

**Table S2.** Shape values for mononuclear Co(II) complexes

| Compound                                                                                                   | HP-6   | PPY-6   | OC-6  | TPR-6  | JPPY-6 | Ref. |
|------------------------------------------------------------------------------------------------------------|--------|---------|-------|--------|--------|------|
| [Co(bim) <sub>4</sub> (dca) <sub>2</sub> ]                                                                 | 30.506 | 29.063  | 0.122 | 16.127 | 32.410 | 3    |
| [Co(4bpo) <sub>2</sub> (H <sub>2</sub> O) <sub>2</sub> (dca) <sub>2</sub> ](H <sub>2</sub> O) <sub>2</sub> | 32.603 | 29.787  | 0.080 | 16.591 | 33.122 | 9    |
| [Co(dca) <sub>2</sub> (NITpPy) <sub>2</sub> (H <sub>2</sub> O) <sub>2</sub> ]                              | 31.801 | 29.395  | 0.077 | 16.316 | 32.683 | 10   |
| [Co(H <sub>2</sub> biim) <sub>2</sub> (dca) <sub>2</sub> ]                                                 | 28.471 | 28.043  | 0.659 | 15.918 | 31.019 | 1    |
| [Co(phen) <sub>2</sub> (dca) <sub>2</sub> ] 1a                                                             | 31.621 | 25.065, | 0.937 | 12.946 | 28.756 | 7    |
| [Co(phen) <sub>2</sub> (dca) <sub>2</sub> ] 1b                                                             | 31.453 | 25.680  | 0.808 | 13.917 | 29.505 | 7    |
| [Co(hdpa) <sub>2</sub> (dca) <sub>2</sub> ]                                                                | 31.718 | 27.598  | 0.357 | 14.744 | 31.031 | 5    |
| [Co(hmpH) <sub>2</sub> (dca) <sub>2</sub> ]                                                                | 32.432 | 25.117  | 1.092 | 12.390 | 29.031 | 11   |
| [Co(tppz) <sub>2</sub> ](dca) <sub>2</sub> ]                                                               | 34.295 | 24.111  | 2.214 | 12.736 | 27.804 | 4    |
| [Co(L1)(dca) <sub>2</sub> ]                                                                                | 33.208 | 22.899  | 2.703 | 11.181 | 27.776 | 2    |
| [Co(12-TMC)(dca) <sub>2</sub> ]                                                                            | 33.728 | 18.840  | 2.966 | 7.590  | 22.627 | 6    |
| [Co(LC) <sub>2</sub> (dca) <sub>2</sub> ]                                                                  | 30.898 | 25.086  | 1.016 | 14.126 | 28.877 | 8    |

### References for mononuclear Co(II) compounds

1. Marshall, S. R.; Incarvito, C. D.; Shum, W. W.; Rheingold, A. L.; Miller, J. S. Novel coordination of dicyanamide, [N(CN)<sub>2</sub>]<sub>2</sub>: preferential binding of the amide nitrogen. *Chem. Commun.* **2002**, 3006–3007.
2. Ghosh, S.; Selvamani, S.; Mehta, S.; Mondal, A. Reversible thermo-induced spin crossover in a mononuclear *cis*-dicyanamido-cobalt(II) complex containing a macrocyclic tetradentate ligand. *Dalton Trans.* **2020**, 49, 9208–9212.
3. Świtlicka-Olszewska, A.; Palion-Gazda, J.; Klemens, T.; Machura, B.; Vallejo, J.; Cano, J.; Lloret, F.; Julve, M. Single-ion magnet behaviour in mononuclear and two-dimensional dicyanamide-containing cobalt(II) complexes. *Dalton Trans.* **2016**, 45, 10181–10193.

4. Palion-Gazda, J.; Machura, B.; Kruszynski, R.; Grancha, T.; Moliner, N.; Lloret, F.; Julve, M. Spin Crossover in Double Salts Containing Six- and Four-Coordinate Cobalt(II) Ions. *Inorg. Chem.* **2017**, *56*, 6281–6296.
5. Xu, J.-Y.; Bian, H.-D.; Wang, Q.-L.; Gu, W.; Yan, S.-P.; Liao, D.-Z.; Cheng, P.; Jiang, Z.-H.; Shen, P.-W. Synthesis, Crystal Structure and Properties of  $[\text{Mn}(\text{hdpa})_2(\text{N}(\text{CN})_2)_2]$  and  $[\text{Co}(\text{hdpa})_2(\text{N}(\text{CN})_2)_2]$  (hdpa = 2,2'-Dipyridylamine). *Z. Anorg. Allg. Chem.* **2003**, *629*, 1063–1067.
6. Cui, H.-H.; Zhang, Y.-Q.; Xue, Z.-L. Magnetic anisotropy and slow magnetic relaxation processes of cobalt(II)-pseudohalide complexes. *Dalton Trans.* **2019**, *48*, 10743–10752.
7. Váhovská, L.; Potocnáka, I.; Vitushkina, S.; Dušek, M.; Titiš, J.; Boca, R. Low-dimensional compounds containing cyanido groups. XXVI. Crystal structure, spectroscopic and magnetic properties of Co(II) complexes with non-linear pseudohalide ligands. *Polyhedron* **2014**, *81*, 396–408.
8. Tabrizi, L.; McArdle, P.; Erxleben, A.; Chiniforoshan, H. Nickel(II) and cobalt(II) complexes of lidocaine: Synthesis, structure and comparative *in vitro* evaluations of biological perspectives. *Eur. J. Med. Chem.* **2015**, *103*, 516–529.
9. Du, M.; Wang, Q.; Li, C.-P.; Zhao, X.J.; Ribas, J. Coordination Assemblies of  $\text{Co}^{\text{II}}/\text{Cu}^{\text{II}}/\text{Zn}^{\text{II}}/\text{Cd}^{\text{II}}$  with 2,5-Bipyridyl-1,3,4-Oxadiazole and Dicyanamide Anion: Structural Diversification and Properties. *Cryst. Growth Des.* **2010**, *10*, 3285–3296.
10. Zhou, H.-B.; Wang, S.-P.; Liu, Z.-Q.; Liao, D.-Z.; Jiang, Z.-H.; Yan, S.-P.; Cheng, P. Supramolecular assemblies of new 2-D complexes: Syntheses, crystal structures, spectroscopic and magnetic properties of  $\{[\text{MnAu}_2(\text{CN})_4(\text{NITpPy})_2(\text{H}_2\text{O})_2]\}_n$  and  $\{[\text{Co}(\text{N}(\text{CN})_2)_2(\text{NITpPy})_2(\text{H}_2\text{O})_2]\}_n$ . *Inorg. Chim. Acta* **2006**, *359*, 533–540.
11. Zheng, L.-L. Synthesis, Crystal Structures and Magnetic Properties of Ternary M(II)-Dicyanamide-hydroxypyridine Complexes. *J. Inorg. Chem.* **2013**, *2013*, 206589.

**Table S3.** Magneto-structural data for binuclear dca-Co(II) compounds.

| Compound                                                                         | Co–N <sub>ligand</sub><br>[Å]                | Co–N <sub>DCA</sub><br>[Å] | Angles<br>[°]          |                        | Co···Co<br>[Å]<br>In dimer<br>Between dimers | Magnetism                                                                                                               | Ref |
|----------------------------------------------------------------------------------|----------------------------------------------|----------------------------|------------------------|------------------------|----------------------------------------------|-------------------------------------------------------------------------------------------------------------------------|-----|
|                                                                                  |                                              |                            | Co–NC <sub>(dca)</sub> | C–N–C <sub>(dca)</sub> |                                              |                                                                                                                         |     |
| [Co(tptz)(H <sub>2</sub> O)(dca)] <sub>2</sub> ·(ClO <sub>4</sub> ) <sub>2</sub> | 2.176(3)<br>2.087(3)<br>2.196(3)<br>2.168    | 2.108(3)<br>2.030(3)       | 145.7(3)<br>169.7(3)   | 122.3(4)               | 7.377(3)<br><br>10.577(2)                    | $\chi_M T = 6.019 \text{ cm}^3 \text{K mol}^{-1}$ at 300 K<br>$\chi_M T = 4.41 \text{ cm}^3 \text{K mol}^{-1}$ at 20 K. | [1] |
| [Co(bpm) <sub>2</sub> (dca)] <sub>2</sub> (ClO <sub>4</sub> ) <sub>2</sub>       | 2.184(5)<br>2.197(5)<br>2.147(5)<br>2.152(5) | 2.150(6)<br>2.126(5)       | 158.0(5)<br>163.7(5)   | 123.5(6)               | 7.592(2)<br><br>9.266(3)                     | undiscussed                                                                                                             | [2] |

**Tptz** = 2,4,6-tris(2-pyridyl)-1,3,5-triazine; **bpm** = bis[(3,5-di methyl)pyrazolyl]methane

#### References for dinuclear Co(II) compounds:

1. Das, A.; Marschner, C.; Cano, J.; Baumgartner, J.; Ribas, J.; El Fallah, M. S; Mitra, S. Synthesis, crystal structures and magnetic behaviors of two dicyanamide bridged di- and polynuclear complexes of cobalt(II) derived from 2,4,6-tris(2-pyridyl)1,3,5-triazine and imidazole. *Polyhedron* **2009**, 28, 2436–2442.
2. Shen, W.Z.; Chen, X.Y.; Cheng, P.; Liao, D.Z.; Yan, S.P.; Jiang, Z.H. Cobalt(II) Complexes with Dicyanamide from Binuclear Entities to Chains. *Z. Anorg. Allg. Chem.* **2003**, 629, 2591–2595.

**Table S4.** Magneto-structural data for one-dimensional dca-Co(II) coordination polymers.

| Compound                                                                                               | Co–N <sub>ligand</sub> [Å]                                                                                   | Co–N <sub>DCA</sub> [Å]                                              | Angles [°]                       |                        | Co···Co in chain or (between chains) [Å] | Magnetism                                                                                                                                                                                       | Ref |
|--------------------------------------------------------------------------------------------------------|--------------------------------------------------------------------------------------------------------------|----------------------------------------------------------------------|----------------------------------|------------------------|------------------------------------------|-------------------------------------------------------------------------------------------------------------------------------------------------------------------------------------------------|-----|
|                                                                                                        |                                                                                                              |                                                                      | Co–NC <sub>(dca)</sub>           | C–N–C <sub>(dca)</sub> |                                          |                                                                                                                                                                                                 |     |
| Single μ <sub>1,5</sub> - dca bridge                                                                   |                                                                                                              |                                                                      |                                  |                        |                                          |                                                                                                                                                                                                 |     |
| [[Co(H <sub>2</sub> BiIm) <sub>2</sub> (dca) <sub>2</sub> ]Cl] <sub>n</sub><br><br>helisa              | 2.1386(18)<br>2.1593(18)<br>2.1372(18)<br>2.1325(18)                                                         | 2.1900(19),<br>2.1133(19)                                            | 124.4(2)<br>172.3(2)             | 120.4(2)               | 7.2860(5)<br><br>7.9690(6)               | <b>dc</b><br>χ <sub>M</sub> T = 2.34 emu K mol <sup>-1</sup><br>D = 40.3 cm <sup>-1</sup> ,<br>zJ/kB = 20.05 cm <sup>-1</sup> ,<br>TIP = 170·10 <sup>-6</sup> emumol <sup>-1</sup>              | [1] |
| [Co(etpybzam)(dca) <sub>2</sub> ] <sub>n</sub>                                                         | 2.154(2)<br>2.086(2)<br>2.240(2)                                                                             | 2.164(3)<br>2.097(3)<br>2.043(3)                                     | 151.4(2)<br>172.6(2)<br>160.7(3) | 122.3(3)<br>122.1(3)   | 8.6068(5)<br><br>7.9531(5)               | <b>dc</b><br>χ <sub>M</sub> T = 3.35 cm <sup>3</sup> mol <sup>-1</sup> K at 300K<br>χ <sub>M</sub> T = 2.25 cm <sup>3</sup> mol <sup>-1</sup> K at 2K                                           | [6] |
| [[Co(imph) <sub>4</sub> (dca)](ClO <sub>4</sub> )·(EtOH) <sub>4</sub> (H <sub>2</sub> O)] <sub>n</sub> | 2.122<br>2.122<br>2.122<br>2.122                                                                             | 2.066<br>2.087                                                       | 180.0                            | 115.14                 | 8.609<br><br>11.8073                     | <b>dc</b><br>χ <sub>M</sub> T = 3.03 cm <sup>3</sup> mol <sup>-1</sup> K at 300K<br>χ <sub>M</sub> T = 1.47 cm <sup>3</sup> mol <sup>-1</sup> K at 2 K                                          | [8] |
| [[Co(L4)(dca)(ClO <sub>4</sub> )(MeOH) <sub>2</sub> ]] <sub>n</sub>                                    | Co(A)<br>2.1619(19)<br>2.0785(19)<br>2.1011(18)<br>2.1323(19)<br>Co(B)<br>2.141(2)<br>2.1017(19)<br>2.097(2) | Co(A)<br>2.1828(18)<br>2.0851(19)<br>Co(B)<br>2.1013(18)<br>2.089(2) |                                  |                        | 8.451 Å<br><br>8.532 Å                   | <b>dc</b><br>χ <sub>M</sub> T = 6.0 cm <sup>3</sup> K mol <sup>-1</sup> at 300K<br>χ <sub>M</sub> T = 3.5 cm <sup>3</sup> Kmol <sup>-1</sup> at 2K<br>lack of significant magnetic interactions | [9] |



|                                                                         |                                                                                                                                       |                                                                                                           |                      |          |                            |                                                                                                                                                                                                                                                                             |      |
|-------------------------------------------------------------------------|---------------------------------------------------------------------------------------------------------------------------------------|-----------------------------------------------------------------------------------------------------------|----------------------|----------|----------------------------|-----------------------------------------------------------------------------------------------------------------------------------------------------------------------------------------------------------------------------------------------------------------------------|------|
|                                                                         | 2.1661(19)                                                                                                                            |                                                                                                           |                      |          |                            |                                                                                                                                                                                                                                                                             |      |
| $\{[\text{Co}(\text{enbzipy})(\text{dca})](\text{PF}_6)]_n$             | 2.097(5)<br>2.038(4)<br>2.045(4)<br>2.109(5)                                                                                          | 2.128(5)<br>2.134(5)                                                                                      | 172.0(5)<br>158.5(4) | 130.1(7) | 8.699(1)<br><br>9.183(1)   | $\chi_{\text{MT}} = 2.67 \text{ cm}^3 \text{ mol}^{-1} \text{ K}$<br>$\chi_{\text{MT}} = 0.65 \text{ cm}^3 \text{ mol}^{-1} \text{ K}$<br>SCO                                                                                                                               | [16] |
| $\{[\text{Co}(\text{bpm})_2(\text{dca})](\text{ClO}_4)]_n$              | 2.141<br>2.141<br>2.141<br>2.141                                                                                                      | 2.102<br>2.102                                                                                            |                      |          | 8.000<br><br>8.551         | –                                                                                                                                                                                                                                                                           | [18] |
| $[\text{Co}(\text{MeOH})_2(3\text{-PyO})(3\text{-PyOH})(\text{dca})]_n$ | 2.138<br>2.138<br>2.124<br>2.124                                                                                                      | 2.102<br>2.102                                                                                            | 165.54<br>165.54     | 121.77   | 8.665<br><br>7.790         | $\chi_{\text{MT}} = 2.98 \text{ cm}^3 \text{ mol}^{-1} \text{ K}$ at 300K<br>$\chi_{\text{MT}} = 1.5 \text{ cm}^3 \text{ mol}^{-1} \text{ K}$ at 2K<br>$C = 3.123 \text{ cm}^3 \text{ mol}^{-1} \text{ K}$<br>$\Theta = -16.29 \text{ K}$                                   | [21] |
| $\{[\text{Co}(\text{bdpab})(\text{dca})](\text{ClO}_4)]_n$              | 2.118(6)<br>2.129(6)<br>2.183(5)<br>2.252(6)                                                                                          | 2.031(6)<br>2.109(6)                                                                                      | 154.7(6)<br>168.6(6) | 122.2(7) | 7.878(1)<br><br>8.737(2)   | very weak or almost zero interaction<br>due to large $\text{Co}\cdots\text{Co}$                                                                                                                                                                                             | [22] |
| $[\text{Co}(\text{pybiu})(\text{dca})]_n$                               | 1.986(3)<br>1.952(4)<br>1.966(3)                                                                                                      | 2.330(4)<br>1.956(5)                                                                                      | 121.3(4)<br>158.1(4) | 120.6(5) | 7.2115(8)<br><br>7.6779(8) | $\chi_{\text{MT}} = 0.399 \text{ cm}^3 \text{ mol}^{-1} \text{ K}$ at 300 K<br>$\chi_{\text{MT}} = 0.102 \text{ cm}^3 \text{ mol}^{-1} \text{ K}$ at 2K                                                                                                                     | [23] |
| $\{[\text{Co}(\text{enbzipy})(\text{dca})](\text{ClO}_4)]_n$            | <b>room temperature</b><br>2.102(3)<br>2.083(3)<br>2.023(3)<br>2.028(3)<br><b>low temperature</b><br>2.138(8)<br>2.074(8)<br>2.089(8) | <b>room temperature</b><br><br>2.092(3)<br>2.136(3)<br><br><b>low temperature</b><br>2.141(9)<br>2.073(8) | 176.3(3)<br>152.7(3) | 121.4(9) | 8.569(8)<br><br>8.390(6)   | $\chi_{\text{MT}} = 2.43 \text{ cm}^3 \text{ mol}^{-1} \text{ K}$ at 300 K<br>$\chi_{\text{MT}} = 1.65 \text{ cm}^3 \text{ mol}^{-1} \text{ K}$ at 171 K<br>$\chi_{\text{MT}} = 1.60 \text{ cm}^3 \text{ mol}^{-1} \text{ K}$ at 2 K<br>small hysteresis loop<br>SCO<br>DSC | [34] |

|                                                                                    |                                                          |                                  |                        |          |                             |                                                                                                                                                                                                                                                                                                                                                                                        |      |
|------------------------------------------------------------------------------------|----------------------------------------------------------|----------------------------------|------------------------|----------|-----------------------------|----------------------------------------------------------------------------------------------------------------------------------------------------------------------------------------------------------------------------------------------------------------------------------------------------------------------------------------------------------------------------------------|------|
|                                                                                    |                                                          |                                  |                        |          |                             |                                                                                                                                                                                                                                                                                                                                                                                        |      |
| $\{[\text{Co}(\text{H}_3\text{daps})(\text{dca})](\text{MeOH})_2(\text{MeCN})\}_n$ | 2.203(3)<br>2.141(3)<br>2.215(3)<br>2.231(2)<br>2.190(2) | 2.083(3)<br>2.081(3)<br>mostek   | 169.1(3)<br>172.1(3)   | 118.2(3) | 7.9803(7)<br><br>10.6741(6) | <b>dc</b><br>$\chi_{\text{MT}} = 2.76 \text{ cm}^3 \text{ mol}^{-1} \text{ K}$ at 300 K<br>$\chi_{\text{MT}} = 1.61 \text{ cm}^3 \text{ mol}^{-1} \text{ K}$ at 2 K<br>$D = 41.3(5) \text{ cm}^{-1}$<br>$E = 0.81(3) \text{ cm}^{-1}$<br>$J = 0.004 \text{ cm}^{-1}$<br><b>Ac</b><br>$U_{\text{eff}} = 9.9 \text{ K}$ (6.88 $\text{cm}^{-1}$ )<br>$\tau = 5.3 \cdot 10^{-6} \text{ s}$ | [37] |
| $\{[\text{Co}(\text{pypz})(\text{dca})(\text{H}_2\text{O}) \cdot \text{dca}]\}_n$  | 2.1082(18)<br>2.1891(19)<br>2.1685(18)                   | 2.057(2)<br>2.096(2)             | 155.6(2)<br>165.03(19) | 121.7(2) | 7.447(6)<br><br>8.4287(7)   | <b>dc</b><br>$\mu_{\text{eff}} = 5.17 \mu\text{B}$<br><b>ac</b><br>$U_{\text{eff}} = 103 \text{ K}$<br>$\tau = 1.2 \cdot 10^{-11} \text{ s}$                                                                                                                                                                                                                                           | [39] |
| $\{[\text{Co}_2(\text{tppz})(\text{dca})_4]_n \cdot \text{CH}_3\text{CN}\}_n$      | 2.078(2)<br>2.213(2)<br>2.220(2)<br>2.005(2)             | 2.096(2)<br>2.104(2)             | 170.4(2)<br>172.4(2)   | 124.6(2) | 8.465(3)<br><br>8.559(3)    | $\chi_{\text{MT}} = 2.99 \text{ cm}^3 \text{ mol}^{-1} \text{ K}$ at 2 K<br>$\theta = -9.78 \text{ K}$<br>$C = 4.92 \text{ cm}^3 \cdot \text{K} \cdot \text{mol}^{-1}$                                                                                                                                                                                                                 | [40] |
| <b>Double <math>\mu_{1,5}</math>- dca bridge</b>                                   |                                                          |                                  |                        |          |                             |                                                                                                                                                                                                                                                                                                                                                                                        |      |
| $\{[\text{Co}(\text{azpyph})(\text{dca})](\text{BF}_4) \cdot \text{MeOH}\}_n$      | 2.309(2)<br>2.041(2)<br>2.346(3)<br>2.045(2)             | 2.070(3)<br>2.100(3)             | 156.3(2)<br>177.2(2)   | 125.3(3) | 8.3790(9)<br><br>9.276(1)   | $\chi_{\text{MT}} = 3.14 \text{ cm}^3 \text{ mol}^{-1} \text{ K}$ at 300 K<br>$D = -72.3 \text{ cm}^{-1}$<br>$E/D = 0.00$<br>$z_j = -0.273 \text{ cm}^{-1}$                                                                                                                                                                                                                            | [2]  |
| $\{[\text{Co}(\text{nic})_2(\text{dca})_2]_n \cdot 2n\text{CH}_3\text{OH}\}_n$     | 2.157<br>2.157                                           | 2.114<br>2.127<br>2.114<br>2.127 | 162.3<br>156.7         | 119.3(3) | 7.353<br><br>6.827          | $\chi_{\text{MT}} = 3.36 \text{ cm}^3 \text{ mol}^{-1} \text{ K}$ at 300 K<br>$\chi_{\text{MT}} = 1.842 \text{ cm}^3 \text{ mol}^{-1} \text{ K}$ at 300 K<br>$C = 3.58 \text{ cm}^3 \cdot \text{mol}^{-1} \cdot \text{K}$ ,<br>$\theta = -17.8 \text{ K}$                                                                                                                              | [3]  |
| $\{[\text{Co}(\text{dca})_2(\text{H}_2\text{O})_2] \cdot (\text{hmt})\}_n$         | 2.082                                                    | 2.123                            | 162.0                  | 118.2(2) | 7.3617                      | <b>dc</b>                                                                                                                                                                                                                                                                                                                                                                              | [5]  |

|                                                                                     |                      |                                              |                      |           |                            |                                                                                                                                                                                                                                                             |      |
|-------------------------------------------------------------------------------------|----------------------|----------------------------------------------|----------------------|-----------|----------------------------|-------------------------------------------------------------------------------------------------------------------------------------------------------------------------------------------------------------------------------------------------------------|------|
|                                                                                     | 2.082                | 2.118<br>2.123<br>2.118                      | 162.6                | 118.2(2)  | 7.1243                     | $\chi_{\text{M}}T = 2.95 \text{ cm}^3 \text{ mol}^{-1} \text{ K}$ at 300 K<br>$\chi_{\text{M}}T = 2.1 \text{ cm}^3 \text{ mol}^{-1} \text{ K}$ at 15 K                                                                                                      |      |
| $[\text{Co}(\text{1-Pyzt})_2(\text{dca})_2]_{\text{n}}$                             | 2.159<br>2.159       | 2.107<br>2.107<br>2.113<br>2.113             | 148.3<br>163.5       | 118.8(1)  | 7.259<br><br>7.817         | <b>dc</b><br>$C = 3.55 \text{ K cm}^3/\text{mol}$<br>$\Theta = -27.6 \text{ K}$                                                                                                                                                                             | [7]  |
| $\{[\text{Co}(\text{H}_2\text{O})_2(\text{dca})_2](2,6\text{-lut-NO})\}_{\text{n}}$ | 2.073(2)<br>2.077(2) | 2.125(3)<br>2.132(3)<br>2.131(3)<br>2.145(3) | 147.1(3)<br>162.8(3) | 119.4(3)  | 7.4471(8)<br><br>7.4471(8) | <b>dc</b><br>$C = 3.39 \text{ cm}^3 \text{ K mol}^{-1}$<br>$\theta = -15.2 \text{ K}$<br>$J = 16.6 \pm 0.3 \text{ K}$                                                                                                                                       | [10] |
| $[\text{Co}(\text{2-ampy})_2(\text{dca})_2]_{\text{n}}$                             | 2.193(3)<br>2.193(3) | 2.126(2)<br>2.126(2)<br>2.128(2)<br>2.128(2) | 157.7<br>165.8       | 121.05(2) | 7.3934<br><br>7.4488       | undiscussed                                                                                                                                                                                                                                                 | [11] |
| $[\text{Co}(\text{dmf})_2(\text{dca})_2]_{\text{n}}$                                | 2.109<br>2.109       | 2.102<br>2.122<br>2.102<br>2.122             | 159.7<br>151.7       | 120.4(3)  | 7.3787<br><br>6.4415       | undiscussed                                                                                                                                                                                                                                                 | [13] |
| $[\text{Co}(\text{im})_2(\text{dca})_2]_{\text{n}}$                                 | 2.095<br>2.095       | 2.152<br>2.152<br>2.157<br>2.157             | 155.7<br>161.7       | 117.9(2)  | 7.3585<br><br>6.5665       | <b>dc</b><br>$\chi_{\text{M}}T = 1.97 \text{ cm}^3 \text{ mol}^{-1} \text{ K}$ at 300 K<br>$\theta = -39.8 \text{ K}$<br>$J = -24.8 \text{ K}$<br>predominant antiferromagnetic coupling                                                                    | [14] |
| $[\text{Co}(\text{im})_2(\text{dca})_2]_{\text{n}}$                                 | 2.101<br>2.101       | 2.164<br>2.164<br>2.161<br>2.161             | 155.4<br>162.1       | 118.6(2)  | 7.395<br><br>6.580         | <b>dc</b><br>$\chi_{\text{M}}T = 3.26 \text{ cm}^3 \text{ mol}^{-1} \text{ K}$ at 300 K<br>$\chi_{\text{M}}T = 1.795 \text{ cm}^3 \text{ mol}^{-1} \text{ K}$ at 2 K<br>$C = 2.8\text{--}3.4 \text{ cm}^3 \text{ K mol}^{-1}$<br>$J = -0.7 \text{ cm}^{-1}$ | [15] |
| $[\text{Co}(\text{4-MOP-NO})_2(\text{dca})_2]_{\text{n}}$                           | Co-O                 | 2.127                                        | 160.6                | 117.7(1)  | 7.3603                     | <b>dc</b>                                                                                                                                                                                                                                                   | [17] |

|                                                                                      |                        |                                              |                                              |                      |                            |                                                                                                                                                                                                                                               |      |
|--------------------------------------------------------------------------------------|------------------------|----------------------------------------------|----------------------------------------------|----------------------|----------------------------|-----------------------------------------------------------------------------------------------------------------------------------------------------------------------------------------------------------------------------------------------|------|
|                                                                                      | 2.0572<br>2.0572       | 2.127<br>2.132<br>2.132                      | 145.9                                        |                      | 6.6096                     | $\chi_{\text{MT}} = 3.24 \text{ cm}^3 \text{ mol}^{-1} \text{ K}$ at 300 K<br>$\chi_{\text{MT}} = 2.20 \text{ cm}^3 \text{ mol}^{-1} \text{ K}$ at 2 K<br>$C = 3.58 \text{ cm}^3 \text{ K mol}^{-1}$<br>$\theta = -15.5 \text{ K}$            |      |
| $[\text{Co}(\text{dmf})_2(\text{dca})_2]_n$                                          | 2.101<br>2.101<br>Co-O | 2.124<br>2.124<br>2.124<br>2.124             | 152.81                                       | 119.34(1)            | 7.393<br><br>7.722         | undiscussed                                                                                                                                                                                                                                   | [18] |
| $[\text{Co}(4\text{-OMP})_2(\text{dca})_2]_n$                                        | 2.125<br>2.125         | 2.116<br>2.116<br>2.124<br>2.124             | 163.26<br>158.50                             | 114.75(5)            | 7.213<br><br>7.076         | <b>dc</b><br>$\chi_{\text{MT}} = 3.24 \text{ cm}^3 \text{ mol}^{-1} \text{ K}$ at 300 K<br>$\chi_{\text{MT}} = 2.20 \text{ cm}^3 \text{ mol}^{-1} \text{ K}$ at 2 K<br>$C = 3.58 \text{ cm}^3 \text{ mol}^{-1}$<br>$\Theta = -15.5 \text{ K}$ | [20] |
| $\{(\text{PPh}_4)[\text{Co}(\text{dca})_4]\}_n$                                      | 2.091<br>2.091         | 2.176<br>2.176<br>2.165<br>2.165             | 157.73<br>157.73                             | 120.8(3)             | 7.589<br><br>12.314        | <b>dc</b><br>$C = 1.394 \text{ cm}^3 \text{ K mol}^{-1}$<br>$\Theta = +0.1 \text{ K}$                                                                                                                                                         | [24] |
| $\{[\text{Co}(\text{phen})(\text{H}_2\text{O})(\text{dca})_2] \cdot \text{MeOH}\}_n$ | 2.210(2)<br>2.127(2)   | 2.112(2)<br>2.103(2)<br>2.106(2)<br>2.126(2) | 152.6(2)<br>149.2(2)<br>160.1(2)<br>166.5(2) | 117.4(2)<br>117.4(2) | 7.3244(5)<br><br>6.7451(6) | undiscussed                                                                                                                                                                                                                                   | [26] |
| $[\text{Co}(\text{pyr})_2(\text{dca})_2]_n$                                          | 2.097(2)<br>2.072(3)   | 2.084(3)<br>2.084(3)<br>2.099(2)<br>2.099(2) | 159.3<br>159.3<br>159.5<br>159.5             | 117.8 115.5          | 7.220<br><br>8.513         | <b>dc</b><br>$\chi_{\text{MT}} = 3.0 \text{ cm}^3 \text{ mol}^{-1} \text{ K}$ at 300 K<br>$\chi_{\text{MT}} = 1.5 \text{ cm}^3 \text{ mol}^{-1} \text{ K}$ at 2 K                                                                             | [28] |
| $[\text{Co}(\text{py-NH}_2)_2(\text{dca})_2]_n$                                      | 2.147<br>2.147         | 2.097<br>2.097<br>2.154<br>2.154             | 173.8<br>144.2                               | 117.9(3)             | 7.2934<br><br>7.6977       | <b>dc</b><br>$\chi_{\text{MT}} = 3.2 \text{ cm}^3 \text{ mol}^{-1} \text{ K}$ at 300 K<br>$\chi_{\text{MT}} = 2.01 \text{ cm}^3 \text{ mol}^{-1} \text{ K}$ at 2 K<br>$C = 3.64 \text{ cm}^3 \text{ mol}^{-1}$                                | [30] |

|                                                                       |                          |                                                      |                      |                  |                          |                                                                                                                                                                                                                                                                                                                                                                                             |      |
|-----------------------------------------------------------------------|--------------------------|------------------------------------------------------|----------------------|------------------|--------------------------|---------------------------------------------------------------------------------------------------------------------------------------------------------------------------------------------------------------------------------------------------------------------------------------------------------------------------------------------------------------------------------------------|------|
|                                                                       |                          |                                                      |                      |                  |                          | $\Theta = -17.9$ K                                                                                                                                                                                                                                                                                                                                                                          |      |
| $[\text{Co}(\text{pyo})_2(\text{dca})_2]_n$                           | 2.075<br>2.075           | 2.121<br>2.121<br>2.121<br>2.121                     | 153.2<br>153.2       | 117.7            | 7.318<br><br>9.405       | <b>dc</b><br>$\chi_M T = 2.7 \text{ cm}^3 \text{ mol}^{-1} \text{ K}$ at 300 K<br>$\chi_M T = 1.4 \text{ cm}^3 \text{ mol}^{-1} \text{ K}$ at 2 K<br>small amount of ferromagnetic or<br>canted antiferromagnetic-ordered<br>impurities $\rightarrow [\alpha\text{- or } \beta\text{-}[\text{Co}(\text{dca})_2]_n]$<br>$C = 2.8\text{--}3.4 \text{ cm}^3 \text{ mol}^{-1}$<br>$J = -1.54$ K | [33] |
| $[\text{Co}(5,6\text{-(Me)}_2\text{-bzim)}_2(\text{dca})_2]_n$        | 2.1165(19)<br>2.1165(19) | 2.1981(14)<br>2.1981(14)<br>2.1981(14)<br>2.1981(14) | 161.49(12)           | 120.20(18)       | 7.734(1)<br><br>9.428(1) | <b>dc</b><br>$D = 63(19) \text{ cm}^{-1}$<br><b>ac</b>                                                                                                                                                                                                                                                                                                                                      | [36] |
| $[\text{Co}(5\text{-Mebzim})_2(\text{dca})_2]_n$                      | 2.122(3)<br>2.122(3)     | 2.141(2)<br>2.141(2)<br>2.141(2)<br>2.141(2)         | 160.41(19)           | $117.8(3)^\circ$ | 7.322(3)<br><br>8.966(1) | <b>dc</b><br>$D = 60(8) \text{ cm}^{-1}$<br><b>ac</b>                                                                                                                                                                                                                                                                                                                                       | [36] |
| $[\text{Co}(\text{bpym})_2(\text{dca})_2]_n \cdot \text{H}_2\text{O}$ | 2.151<br>2.151           | 2.092<br>2.092                                       | 161.8<br>150.8       | 125.0(9)         | 8.649<br>6.735           | <b>dc</b><br>$\Theta = -42$ K<br>$\chi_M T = 3.33 \text{ emu K mol}^{-1}$                                                                                                                                                                                                                                                                                                                   | [38] |
| $\{[\text{Ph}_4\text{P}]_2[\text{Co}(\text{dca})_2]_4\}_n$            | 2.083<br>2.083           | 2.166<br>2.166<br>2.160<br>2.160                     | 158.0<br>153.8       | 120.7(2)         | 7.5684<br><br>12.2867    | No peaks in ac measurements                                                                                                                                                                                                                                                                                                                                                                 | [41] |
| $[\text{Co}(\text{dmf})_2(\text{dca})_2]_n$                           | 2.097<br>2.097           | 2.124<br>2.124<br>2.134<br>2.134                     | 151.4<br>155.1       | 119.3(7)         | 7.403<br><br>7.728       | undiscussed                                                                                                                                                                                                                                                                                                                                                                                 | [42] |
| $[\text{Co}(\text{apym})(\text{dca})_2]_n$                            | 2.159                    | 2.112<br>2.112                                       | $\mu_{1.5}$<br>162.4 | 117.8<br>117.8   | 6.1182                   | undiscussed                                                                                                                                                                                                                                                                                                                                                                                 | [6]  |

|                                                                                                                                                  |                                                             |                                                                             |                                                                                 |                          |                                                                                     |                                                                                                                                       |      |
|--------------------------------------------------------------------------------------------------------------------------------------------------|-------------------------------------------------------------|-----------------------------------------------------------------------------|---------------------------------------------------------------------------------|--------------------------|-------------------------------------------------------------------------------------|---------------------------------------------------------------------------------------------------------------------------------------|------|
|                                                                                                                                                  |                                                             | 2.085<br>2.085                                                              | 161.2<br>$\mu_3$<br>Co-NC<br>120.7<br>120.7                                     |                          |                                                                                     |                                                                                                                                       |      |
| [Co(pydz) <sub>2</sub> (dca) <sub>2</sub> ] <sub>n</sub><br>monoclinic                                                                           | 2.166<br>2.166                                              | 2.110<br>2.110<br>2.110<br>2.110                                            | 158.2<br>158.2                                                                  | 119.4                    | 7.3409<br><br>9.3107                                                                | <b>dc</b><br>$\mu_{\text{eff}} = 5.26 \mu_B$<br>$C = 3.46 \text{ cm}^3 \text{ mol}^{-1}$<br>$\Theta = -20.46 \text{ K}$               | [19] |
| <b><math>\mu_{1,3,5}</math>- dca bridge</b>                                                                                                      |                                                             |                                                                             |                                                                                 |                          |                                                                                     |                                                                                                                                       |      |
| [Co(pydz) <sub>2</sub> (dca) <sub>2</sub> ] <sub>n</sub><br>orthorhombic                                                                         | 2.140                                                       | Single $\mu_{1,5}$<br>2.088<br><br>$\mu_{1,3,5}$<br>2.122<br>2.122<br>2.231 | Single $\mu_{1,5}$<br>162.93<br>162.93<br><br>$\mu_{1,3,5}$<br>160.12<br>160.12 | 117.72<br><br><br>117.09 | 7.3474 (via<br>$\mu_{1,5}$ )<br>and<br>6.0490 (via<br>$\mu_{1,3,5}$ )<br><br>9.4155 | <b>dc</b><br>$\mu_{\text{eff}} = 5.29 \mu_B$<br>$C = 3.50 \text{ cm}^3 \text{ mol}^{-1}$<br>$\Theta = -18.11 \text{ K}$               | [19] |
| <b>double Bridges (ligand + dca)</b>                                                                                                             |                                                             |                                                                             |                                                                                 |                          |                                                                                     |                                                                                                                                       |      |
| [Co(bpds)(dca) <sub>2</sub> ] <sub>n</sub>                                                                                                       | 2.180<br>2.180                                              | 2.136<br>2.144<br>2.136<br>2.144                                            | 152.2<br>159.5                                                                  | 121.5(5)                 | 7.302<br><br>8.092                                                                  | $\chi_M T = 3.1 \text{ cm}^3 \text{ mol}^{-1} \text{ K}$ at 300 K<br>$\chi_M T = 1.65 \text{ cm}^3 \text{ mol}^{-1} \text{ K}$ at 2 K | [5]  |
| [Co(bpp)(dca) <sub>2</sub> ] <sub>n</sub>                                                                                                        | 2.143<br>2.143                                              | 2.119<br>2.119<br>2.130<br>2.130                                            | 152.78<br>156.46                                                                | 118.9(3)                 | 7.0497<br><br>8.1720                                                                | $\chi_M T = 1.88 \text{ emu mol}^{-1} \text{ K}$ at 300 K<br>$\chi_M T = 1.59 \text{ cm}^3 \text{ mol}^{-1} \text{ K}$ at 2 K         | [35] |
| {[Co <sub>3</sub> (nic) <sub>4</sub> (H <sub>2</sub> O) <sub>8</sub> (dca) <sub>2</sub> ] $\cdot$ (H <sub>2</sub> O) <sub>2</sub> ] <sub>n</sub> | Co1 and Co3<br>2.057(3)<br>2.115(3)<br>2.145(3)<br>2.161(3) | Co1 and<br>Co3<br>2.087(3)–<br>2.142(3)                                     | -                                                                               | -                        | -                                                                                   | short-range antiferromagnetic<br>coupling                                                                                             | [32] |

|                                                                                                                                               |                                                                      |                                              |                                              |                      |                                            |                                                                                                                                                                                                                                        |      |
|-----------------------------------------------------------------------------------------------------------------------------------------------|----------------------------------------------------------------------|----------------------------------------------|----------------------------------------------|----------------------|--------------------------------------------|----------------------------------------------------------------------------------------------------------------------------------------------------------------------------------------------------------------------------------------|------|
|                                                                                                                                               | Co2<br>2.093(2)<br>2.094(2)                                          |                                              |                                              |                      |                                            |                                                                                                                                                                                                                                        |      |
| [Co <sub>2</sub> (tppz)(dca) <sub>4</sub> ] <sub>n</sub>                                                                                      | 2.156(2)<br>2.156(2)<br>2.114(2)<br>2.114(2)<br>2.140(2)<br>2.140(2) | 2.044(2)<br>2.044(2)<br>2.141(2)<br>2.141(2) | 168.9(2)<br>152.3(2)                         | 119.1(2)             | 7.377 A<br><br>5.9262(5)                   | <b>dc</b><br>$\chi_{MT} = 4.12 \text{ cm}^3 \text{ mol}^{-1} \text{ K}$ at 300 K<br>$\chi_{MT} = 0.20 \text{ cm}^3 \text{ mol}^{-1} \text{ K}$ at 2K<br>$J = -1.10 \text{ cm}^{-1}$<br>$J' = -0.05 \text{ cm}^{-1}$                    | [27] |
| <b>dca as a co-ligand</b>                                                                                                                     |                                                                      |                                              |                                              |                      |                                            |                                                                                                                                                                                                                                        |      |
| [Co(bimb) <sub>2</sub> (dca) <sub>2</sub> ] <sub>n</sub>                                                                                      | 2.168<br>2.154<br>2.168<br>2.154                                     | 2.139<br>2.139                               | 169.9<br>169.9                               | 124.1(2)<br>124.1(2) | 10.146<br><br>7.583                        | undiscussed                                                                                                                                                                                                                            | [4]  |
| [Co(HFlu) <sub>2</sub> (dca) <sub>2</sub> ] <sub>n</sub>                                                                                      | 2.082<br>2.082                                                       | 2.140<br>2.172                               | 147.96<br>162.33                             | 123.2(5)             | 10.132<br><br>9.073                        | undiscussed                                                                                                                                                                                                                            | [12] |
| [Co(bte) <sub>2</sub> (dca) <sub>2</sub> ] <sub>n</sub>                                                                                       | 2.165<br>2.165<br>2.124<br>2.124                                     | 2.132<br>2.132                               | 157.0                                        | 119.4(3)             | 8.345<br><br>9.597                         | <b>dc</b><br>$\chi_{MT} = 3.2 \text{ cm}^3 \text{ mol}^{-1} \text{ K}$ at 300K<br>$\chi_{MT} = 1.32 \text{ cm}^3 \text{ mol}^{-1} \text{ K}$ at 2K<br>$\theta = -0.57 \text{ K}$<br>$C = 2.80 \text{ cm}^3 \text{ mol}^{-1} \text{ K}$ | [29] |
| [Co(4-bpmp) <sub>2</sub> (H <sub>2</sub> O) <sub>2</sub> (dca) <sub>2</sub> ] <sub>n</sub>                                                    | 2.110<br>2.110<br>2.149                                              | 2.104<br>2.104                               | 160.9                                        | 123.9(2)             | 16.652<br><br>8.2570                       | undiscussed                                                                                                                                                                                                                            | [31] |
| <b>Two different dca bridges</b>                                                                                                              |                                                                      |                                              |                                              |                      |                                            |                                                                                                                                                                                                                                        |      |
| {(Ph <sub>4</sub> As) <sub>2</sub> [Co <sub>2</sub> (dca) <sub>6</sub> (H <sub>2</sub> O)]·H <sub>2</sub> O·xCH <sub>3</sub> OH} <sub>n</sub> | 2.108(4)<br>2.100(4)                                                 | 2.133(4)<br>2.096(4)<br>2.116(4)<br>2.119(5) | 157.4(4)<br>161.7(4)<br>154.1(3)<br>164.3(4) | 118.6(5)<br>117.4(4) | 7.3703(8)<br>In the<br>ladder<br>8.6502(8) | $\mu_{\text{eff}} = 4.8 \mu_B$ at 300 K<br>$\mu_{\text{eff}} = 3.94 \mu_B$ at 4.5 K                                                                                                                                                    | [25] |

|  |  |  |  |  |            |  |  |
|--|--|--|--|--|------------|--|--|
|  |  |  |  |  | 10.1883(9) |  |  |
|--|--|--|--|--|------------|--|--|

**H<sub>2</sub>BiIm** = 2,2'-biimidazole; **L(azpyph)** = N,N'-di-tert-butyl-2,11 diaza[3,3](2,6)pyridinophane; **nic** = isonicotinamide; **bimb** = 1,4-bis(im idazol-1-yl)-butane; **hmt** = hexamethylenetetramine; **bpds** = 4,4'-bipyridyl disulfide; **etpybzam** = (N,N-diethyl,N'-(pyridin-2-yl)benzylidene)ethane-1,2-diamine; **1-Pytz** = 1-(pyrid-2-yl)-1H-tetrazole; **imph** = 4-(imidazol 1-yl)phenol; **L<sup>4</sup>** = N<sup>4</sup>-Schiff base ligand; **2ampy** = 2-aminopyridine; **2,6-lut-NO** = 2,6-lutidine-N-oxide; **HFlu** = fluconazole; **dmf** = dimethylformamide; **im** = imidazole; **enbzy** = N,N'-(bis(pyridine-2-yl)benzylidene)ethane-1,2-diamine; **MOP-NO** = 4-methoxypyridine-N-oxide; **bpm** = bis[(3,5-dimethyl)pyrazolyl]methane; **pydz** = pyridazine; **4-OMP** = 4-hydroxymethylpyridine; **3-pyOH** = 3-hydroxypyridine; **bdpap** = pyrazolyl containing tetradentate N<sup>4</sup>- coordinate ligand; **pybiu** = N-(picolinoyl)-biurate; **phen** = 4,7-phenanthroline, **tpyz** = tetra-2-pyridylpyrazine; **pyr** = 2-pyrrolidone; **bte** = 1,2-bis(1,2,4-triazol-1-yl)ethane; **py-NH<sub>2</sub>** = 2-aminopyridine; **4-bpmp** = bis(4-pyridylmethyl)piperazine; **pyo** = pyridine-N-oxide; **enbzy** = N,N'-bis(2-pyridinylben zylidene)ethane-1,2-diamine; **5,6-(Me)<sub>2</sub>-bzim** = 5,6-dimethylbenzimidazole, **5-Mebzim** = 5-methyl benzimidazole, **H<sub>4</sub>daps** = 2,6-bis(1-salicyloylhydrazonoethyl)pyridine; **bpym** = 2,2'-bipyrimidine; **apym** = 2-aminopyrimidine; **pypz** = 2,6- bis(pyrazol-1-yl)pyridine; **bpp** = 1,3-bis(4'-pyridyl)propane; **H<sub>3</sub>daps** = 2,6-bis(1-salicyloylhydrazonoethyl) pyridine

#### References for 1D Co(II) coordination polymers:

1. Marshall, S. R.; Incarvito, C. D.; Shum, W. W.; Rheingold, A. L.; Miller, J. S. Novel coordination of dicyanamide, [N(CN)<sub>2</sub>]<sub>2</sub>: preferential binding of the amide nitrogen. *Chem. Commun.* **2002**, 3006–3007.
2. Ghosh, S.; Kamily, S.; Rouziers, M.; Herchel, R.; Mehta, S.; Mondal, A. Reversible Spin-State Switching and Tuning of Nuclearity and Dimensionality via Nonlinear Pseudohalides in Cobalt(II) Complexes. *Inorg.Chem.* **2020**, 59, 17638–17649.
3. Zheng, L.L.; Zhuang, X.-M. Z. Syntheses, Crystal Structures and Magnetism of Three Metal–Dicyanamide Coordination Polymers with Isonicotinamide Co-Ligand. *Anorg. Allg. Chem.* **2010**, 636, 2500–2507.
4. Wang, Y. ; Qi, Y. Six New Coordination Polymers: from Dimer to 2D Network based on the Combination of *cis*-Bis(imidazole) Spacers with Cobalt(II) Cations. *Z. Anorg. Allg. Chem.* **2014**, 640, 2609–2615.
5. Manna, S. C.; Ghosh, A. K.; Ribas, J.; Drew, M. G.B.; Lin, C.-N.; Zangrando, E.; Chaudhuri, N. R. Synthesis, crystal structure, magnetic behavior and thermal property of three polynuclear complexes: [M(dca)<sub>2</sub>(H<sub>2</sub>O)<sub>2</sub>]<sub>n</sub>(hmt)<sub>n</sub> [M=Mn(II), Co(II)] and [Co(dca)<sub>2</sub>(bpds)]<sub>n</sub> [dca, dicyanamide; hmt, hexamethylenetetramine; bpds, 4,4'-bipyridyl disulfide]. *Inorg. Chim. Acta* **2006**, 359, 1395–1403.



6. Kundu, S.; Roy, S.; Bhar, K.; Ghosh, R.; Lin, C.-H.; Ribas, J.; Ghosh, B. K. Syntheses, structures and magnetic properties of two one-dimensional coordination polymers of cobalt(II) and nickel(II) dicyanamide containing a tridentate N-donor Schiff base. *J.Mol.Struct.* **2013**, 1038, 78–85.
7. Ivanova, A.D.; Grigoriev, Y.V.; Komarov, V. Y.; Sukhikha, T. S.; Bogomyakov, A.S.; Sheludyakova, L.A.; Lavrenova, L. G. First examples of Co(II), Ni(II), and Cu(II) coordination compounds with 1-(pyrid-2-yl)-1H-tetrazole: Synthesis, structure and properties. *Polyhedron* **2020**, 189, 114750
8. Zheng, L.; Hu, S.; Zhou, A. Two three-dimensional supramolecular networks built from metallophenols through hydrogen bonds and coordinate bonds. *Trans. Met. Chem.* **2015**, 40, 637–642.
9. Banerjee, S.; Halder, S.; Brandão, P.; Gómez García, C. J.; Benmansour, S.; Saha, A. Synthesis and characterization of a novel dicyanamide-bridged Co(II) 1-D coordination polymer with a N4-donor Schiff base ligand. *Inorg. Chim. Acta* **2017**, 464, 65–73.
10. Mautner, F. A.; Jantscher, P. V.; Fischer, R. C.; Reichmann, K.; Massoud, S. S.; Speed, S.; Vicente, R. Synthesis, crystal structures, spectral, magnetic and thermal properties of 1-D polymeric dicyanamido-metal(II) complexes. *Polyhedron* **2021**, 204, 115263.
11. Yuoh, A. C. B.; Agwara, M.O.; Yufanyi, D. M.; Conde, M.A.; Jagan, R.; Eyong, K. O. Synthesis, Crystal Structure, and Antimicrobial Properties of a Novel 1-D Cobalt Coordination Polymer with Dicyanamide and 2-Aminopyridine. *Internat. J. Inorg. Chem.* **2015**, 1–8.
12. Zhao, X.J.; Wang, Q.; Du, M. Metal-directed assembly of 1-D and 2-D coordination polymers with fluconazole and dicyanamide co-ligand. *Inorg. Chim. Acta* **2007**, 360, 1970–1976.
13. Pal, P.; Konar, S.; Lama, P.; Das, K.; Bauza, A.; Frontera, A.; Mukhopadhyay, S. On the Importance of Noncovalent Carbon-Bonding Interactions in the Stabilization of a 1D Co(II) Polymeric Chain as a Precursor of a Novel 2D Coordination Polymer. *J. Phys. Chem. B* **2016**, 120, 6803–6811.
14. Sen, R.; Bhattacharjee, A.; Gütlich, P.; Miyashita, Y.; Okamoto, K.-I.; Koner, S. Structural and magnetic diversity in metal-dicyanamido polymer moieties: Paramagnetic and antiferromagnetic 1D chain compound and weakly ferromagnetic 2D motif. *Inorg. Chim. Acta* **2009**, 362, 4663–4670.
15. Das, A.; Marschner, C.; Canoc, J.; Baumgartner, J.; Ribas, J.; El Fallah, M. S.; Mitra, S. Synthesis, crystal structures and magnetic behaviors of two dicyanamide bridged di- and polynuclear complexes of cobalt(II) derived from 2,4,6-tris(2-pyridyl)1,3,5-triazine and imidazole. *Polyhedron* **2009**, 28, 2436–2442.
16. Roy, S.; Choubey, S.; Bhar, K.; Sikdar, N.; Costa, J.S.; Mitrad, P.; Ghosh, B. K. Counter anion dependent gradual spin transition in a 1D cobalt(II) coordination polymer. *Dalton Trans.* **2015**, 44, 7774.
17. Mautner, F. A.; Jantscher, P.; Fischer, R. C.; Torvisco, A.; Vicente, R.; Karsili, T. N. V.; Massoud, S. S. Synthesis, crystal structures, spectral and magnetic properties of 1-D polymeric dicyanamido-metal(II) complexes. *Magnetochemistry* **2019**, 5, 41.

18. Shen, W.-Z.; Chen, X.-Y.; Cheng, P.; Liao, D.-Z.; Yan, S.-P.; Jiang, Z.-H. Cobalt(II) Complexes with Dicyanamide from Binuclear Entities to Chains. *Z. Anorg. Allg. Chem.* **2003**, 629, 2591–2595.
19. Wriedt, M.; Näther, C. Directed synthesis of  $\mu$ -1,3,5 bridged dicyanamides by thermal decomposition of  $\mu$ -1,5 bridged precursor compounds. *Dalton Trans.* **2011**, 40, 886–898.
20. Mautner, F. A.; Traber, M.; Fischer, R.C.; Massoud, S. S.; Vicente, R. Synthesis, crystal structures, spectral and magnetic properties of 1-D polymeric dicyanamido-metal(II) complexes. *Polyhedron*, **2017**, 138, 13–20.
21. Zheng, L. L.; Zhou, C. X.; Hu, S.; Zhou, A.J. Structural diversification of coordination assemblies of  $M^{II}$ -dca– Hydroxypyridine (dca = Dicyanamide). *Polyhedron* **2016**, 104, 91–98.
22. Munshi, S. J.; Sadhu, M. H.; Kundu, S.; Savani, C.; Kumar, S. B. Synthesis, characterization and structures of binuclear copper(II) and polynuclear cobalt(II), nickel(II) and cadmium(II) complexes involving N4-donor pyrazolyl based ligand and dicyanamide as bridging ligand. *J. Mol. Struct.* **2020**, 1209, 127984.
23. Biswas, M.; Pilet, G.; El Fallah, M. S.; Ribas, J.; Mitra, S. Design of a flexible ligand for the construction of a one-dimensional metal-organic coordination polymer. *Inorg. Chim. Acta* **2008**, 361, 387–392.
24. Jäger, L.; Wagner, C.; Korabik, M.; Zygmunt, A.; Mroziński, Crystal structure, magnetism and spectroscopy of bis(tetraphenylphosphonium)tetrakis(dicyanido cobalt(II)) with bridging and pendant dicyanamide ligands. *J. Mol. Struct.* **2001**, 570, 159–164.
25. van der Werff, P.M.; Batten, S. R.; Jensen, P.; Moubaraki, B.; Murray, K. S.; Tan, E.H.-K. Structure and magnetism of anionic dicyanamidometallate extended networks of types  $(Ph_4As)[M^{II}(dca)_3]$  and  $(Ph_4As)_2[M_2^{II}(dca)_6(H_2O)] \cdot H_2O \cdot xCH_3OH$ , where dca =  $N(CN)_2^-$  and  $M^{II} = Co, Ni$ . *Polyhedron* **2001**, 20, 1129–1138.
26. Tonzing, D. S.; Batten, S. R.; Murray, K. S. 1D chain structures of  $M(dca)_2(phen)(H_2O) \cdot MeOH$ ,  $M = Mn, Fe, Co, Ni, Zn, Cd$ , dca = dicyanamide,  $N(CN)_2^-$ , phen = 4,7-phenanthroline. *J. Mol. Struct.* **2006**, 796, 63–68.
27. Hsu, G.-Y.; Chen, C.-W.; Cheng, S.C.; Lin, S.-H.; Wei, H.-H.; Lee, C.-J. Structure and magnetic properties of one-dimensional metal complexes constructed from alternating dicyanamide linked through binuclear metal tetra-2-pyridylpyrazine subunits *Polyhedron* **2005**, 24, 487–494.
28. Sun, B.-W.; Gao, S.; Ma, B.-Q.; Wang, Z.-M. Syntheses, structures and magnetic properties of 1-D coordination polymers containing both dicyanamide and 2-pyrrolidone. *Inorg. Chem. Commun.* **2001**, 4, 72–75.
29. Li, B.L.; Wan, X.-Y.; Zhu, X.; Gao, S.; Zhang, Y. Synthesis, crystal structure and magnetic behavior of two cobalt coordination polymers with 1,2-bis(1,2,4-triazol-1-yl)ethane and dicyanamide. *Polyhedron* **2007**, 26, 5219–5224.
30. Mautner, F.A.; Jantscher, P.; Fischer, R.C.; Torvisco, A.; Vicente, R.; Karsilid, T. N.V.; Massoud, S. S. Synthesis and characterization of 1D coordination polymers of metal(II)-dicyanamido complexes. *Polyhedron* **2019**, 166, 36–43.

31. Hardy, A. M.; LaDuca, R. L. Synthesis and structure of a cobalt dicyanamide chain coordination polymer incorporating a long-spanning hydrogen-bonding capable diimine with a novel binodal (4,6)-connected supramolecular topology. *Inorg. Chem. Commun.* **2009**, *12*, 308–311.
32. Kutasi, A. M.; Batten, S. R.; Harris, A. R.; Moubaraki, B.; Murray, K. S. Structure and magnetism of the ladder-like coordination polymer  $\text{Co}_3(\text{dca})_2(\text{nic})_4(\text{H}_2\text{O})_8 \cdot 2\text{H}_2\text{O}$  [dca = dicyanamide anion,  $\text{N}(\text{CN})_2^-$ ; nic = nicotinate anion]. *CrystEngComm* **2002**, *4*(36), 202–204.
33. Ghoshal, D.; Mostafa, G.; Maji, T. K.; Zangrando, E.; Lu, T.-H.; Ribas, J.; Chaudhuri, N.R. Synthesis, crystal structure and magnetic behavior of three polynuclear complexes:  $[\text{Co}(\text{pyo})_2(\text{dca})_2]_n$ ,  $[\text{Co}_3(\text{ac})_4(\text{bpe})_3(\text{dca})_2]_n$  and  $[\{\text{Co}(\text{male})(\text{H}_2\text{O})_2\}(\text{H}_2\text{O})]_n$  [pyo, pyridine-N-oxide; dca, dicyanamide; ac, acetate; bpe, 1,2-bis-(4-pyridyl)ethane and male, maleate] *New J. Chem.* **2004**, *28*, 1204–1213.
34. Bhar, K.; Khan, S.; Costa, J. S.; Ribas, J.; Roubeau, O.; Mitra, P.; Ghosh, B. K. Crystallographic Evidence for Reversible Symmetry Breaking in a Spin-Crossover d7 Cobalt(II) Coordination Polymer. *Angew. Chem. Int. Ed.* **2012**, *51*, 2142–2145.
35. Gao, E.-Q.; Bai, S.-Q.; Wang, Z.-M.; Yan, C.H. One- and two-dimensional metal–dicyanamido complexes with a flexible bridging co-ligand: structural and magnetic properties. *Dalton Trans.* **2003**, 1759–1764.
36. Świtlicka, A.; Bieńko, D. C.; Machura, B.; Rajnák, C.; Bieńko, A.; Koziel, S.; Boča, R.; Ozarowski, A.; Ozerov, M. Non-traditional thermal behavior of Co(II) coordination networks showing slow magnetic relaxation. *Inorg. Chem. Front.* **2021**, *8*, 4356–4366.
37. Mondal, A. K.; Mondal, A.; Konar, S. Slow Magnetic Relaxation in a One-Dimensional Coordination Polymer Constructed from Hepta-Coordinate Cobalt(II) Nodes. *Magnetochemistry* **2020**, *6*, 45.
38. Marshall, S.R.; Incarvito, C. D.; Manson, J. L.; Rheingold, A. L.; Miller, J.S. Synthesis, Structure, and Magnetic Properties of  $\text{Co}_2[\{\text{N}(\text{CN})_2\}_4\text{bpym}] \cdot \text{H}_2\text{O}$  and  $\text{M}\{\{\text{N}(\text{CN})_2\}_2\text{bpym}\} \cdot \text{H}_2\text{O}$  (M = Mn, Fe, Co; bpym = 2,2'-Bipyrimidine). *Inorg. Chem.* **2000**, *39*, 1969–1973.
39. Świtlicka, A.; Bieńko, D.C.; Titiš, J.; Machura, B.; Penkala, M.; Bieńko, A.; Rajnák, C.; Boča, R.; Ozarowski, A. Slow magnetic relaxation in hexacoordinated cobalt(II) field-induced single-ion magnets. *Inorg. Chem. Front.* **2020**, *7*, 2637–2650.
40. Luo, J.; Qiu, L.; Liu, B.; Zhang, X.; Yang, F.; Cui, L. Synthesis, Structure and Magnetic Properties of Two Cobalt(II) Dicyanamide (dca) Complexes with Heterocyclic Nitrogen Donors Tetra(2-pyridyl)pyrazine (tppz) and 2,4,6-Tri(2-pyridyl)-1,3,5-triazine (tptz):  $[\text{Co}_2(\text{tppz})(\text{dca})_4] \cdot \text{CH}_3\text{CN}$  and  $[\text{Co}(\text{tptz})(\text{dca})(\text{H}_2\text{O})](\text{dca})$ . *Chin. J. Chem.* **2012**, *30*, 522.
41. Raebiger, J.W.; Manson, J.L.; Sommer, R.D.; Geiser, U.; Rheingold, A.L.; Miller, J.S. 1-D and 2-D Homoleptic Dicyanamide Structures,  $[\text{Ph}_4\text{P}]_2\{\text{Co}^{\text{II}}[\text{N}(\text{CN})_2]_4\}$  and  $[\text{Ph}_4\text{P}]\{\text{M}[\text{N}(\text{CN})_2]_3\}$  (M = Mn, Co). *Inorg. Chem.* **2001**, *40*, 2578.
42. Dong, W.; Liang, M.; Sun, Y.-Q.; Liu, Z.-Q. Syntheses and Structures of two 1-D Complexes,  $[\text{Co}(\text{dmf})_2(\text{NCNCN})_2]$  and  $[\text{Cu}(\text{bipy})(\text{NCNCN})]\text{ClO}_4$  with Bridging Dicyanamide Ligands. *Z. Anorg. Allg. Chem.* **2003**, *629*, 2443.
43. 6a. Jensen, P.; Batten, S.R.; Moubaraki, B.; Murray, K. S. Infinite molecular tubes: structure and magnetism of  $\text{M}(\text{dca})_2(\text{apym})$  [M = Co, Ni, apym = 2-aminopyrimidine, dca = dicyanamide,  $\text{N}(\text{CN})_2^-$ ]. *Chem. Commun.* **2000**, 793–794.

**Table S5.** Magneto-structural data for two-dimensional dca-Co(II) coordination polymer

| Compound                                   | Co–N <sub>Ligand</sub><br>[Å]    | Co–N <sub>DCA</sub><br>[Å]                                                                                                                                      | Kąty [°]                                                                        |                        | Co...Co<br>[Å]                                                    | Magnetyzm                                                                                                                                                                                                                                                                                                                                                                                                                                              | Ref |
|--------------------------------------------|----------------------------------|-----------------------------------------------------------------------------------------------------------------------------------------------------------------|---------------------------------------------------------------------------------|------------------------|-------------------------------------------------------------------|--------------------------------------------------------------------------------------------------------------------------------------------------------------------------------------------------------------------------------------------------------------------------------------------------------------------------------------------------------------------------------------------------------------------------------------------------------|-----|
|                                            |                                  |                                                                                                                                                                 | Co–NC <sub>dca</sub>                                                            | C–N–C <sub>(dca)</sub> |                                                                   |                                                                                                                                                                                                                                                                                                                                                                                                                                                        |     |
| μ <sub>3</sub> + μ <sub>1,5</sub>          |                                  |                                                                                                                                                                 |                                                                                 |                        |                                                                   |                                                                                                                                                                                                                                                                                                                                                                                                                                                        |     |
| [Co(pzdo)(dca) <sub>2</sub> ] <sub>n</sub> | Co1<br>2.138<br>2.138<br>Co(2)-  | Co1<br>μ <sub>1,5</sub><br>2.099<br>2.099<br>2.099<br><br>Co(2)<br>μ <sub>1,5</sub><br>2.089<br>2.089<br>2.089<br>2.089<br><br>μ <sub>3</sub><br>2.179<br>2.179 | μ <sub>1,5</sub><br>149.5<br>149.5<br>μ <sub>3</sub><br>160.5<br>160.5          | 119.9<br>120.8         | Co1...Co1<br>7.4313<br>Co2...Co2<br>7.4313<br>Co1...Co2<br>6.0188 | <b>dc</b><br>χT = 3.08 cm <sup>3</sup> ·K·mol <sup>-1</sup> at 300 K<br>χT =3.07 cm <sup>3</sup> ·K·mol <sup>-1</sup> at 8 K<br>χT =3.15 cm <sup>3</sup> ·K·mol <sup>-1</sup> at 2 K<br>Θ = –9.4 K<br>C = 3.17 cm <sup>3</sup> mol <sup>-1</sup> K<br>FCM and ZFCM curves<br>measured in a low field of 100<br>Oe show two abrupt increases<br>in M at ca. 8.5 and 2 K,<br>indicating the occurrence of two<br>long-range ferromagnetic<br>transitions | [4] |
| [Co(mpdo)(dca) <sub>2</sub> ] <sub>n</sub> | Co(1)<br>7.499<br>7.499<br>Co(2) | Co(1)<br>2.136<br>2.136<br>2.154<br>2.154<br>Co(2)<br>2.096                                                                                                     | μ <sub>1,5</sub><br>148.1<br>148.1<br>155.3<br>155.3<br>μ <sub>3</sub><br>161.7 | 148.1<br>119.3         | Co1...Co1<br>7.5001<br>Co2...Co2<br>7.5001<br>Co1...Co2<br>6.078  | <b>dc</b><br>χT = 3.06 cm <sup>3</sup> ·K·mol <sup>-1</sup> at 4.75 K<br>Θ = –13.7 K<br>C = 3.34 cm <sup>3</sup> mol <sup>-1</sup> K<br>ZFCM and FCM data show<br>phase transitions<br><b>ac</b>                                                                                                                                                                                                                                                       | [4] |

|                                                                      |                      |                                                                           |                                                                                    |                      |                                                                      |                                                                                                                                                                                                        |      |
|----------------------------------------------------------------------|----------------------|---------------------------------------------------------------------------|------------------------------------------------------------------------------------|----------------------|----------------------------------------------------------------------|--------------------------------------------------------------------------------------------------------------------------------------------------------------------------------------------------------|------|
|                                                                      |                      | 2.096<br>2.100<br>2.100                                                   | 161.7                                                                              |                      |                                                                      | nonzero values of $\chi'$ and $\chi''$ signals at about 8.2 and 2.5 K<br>hysteresis loop measured at 1.78 K                                                                                            |      |
| $[\text{Co}_2(2,5\text{-dmpdo})_2(\text{dca})_4]_n$                  | 2.122<br>2.122       | $\mu_{1,5}$<br>2.065<br>2.104<br>$\mu_3$<br>2.177<br>2.089                | $\mu_{1,5}$<br>172.1<br>153.2<br>$\mu_3$<br>118.9<br>166.7                         | 120.4(2)<br>174.6(3) | via $\mu_{1,5}$ -<br>dca<br>7.8770<br><br>via $\mu_3$ -dca<br>5.8034 | <b>dc</b><br>$\chi T = 6.03 \text{ cm}^3 \cdot \text{K} \cdot \text{mol}^{-1}$ at 300 K<br>$C = 6.61 \text{ cm}^3 \text{ mol}^{-1} \text{ K}$<br>$\Theta = -33.5 \text{ K}$<br>$T_N = 10.8 \text{ K}$  | [23] |
| <b><math>\mu_3 + \mu_{1,3,5}</math></b>                              |                      |                                                                           |                                                                                    |                      |                                                                      |                                                                                                                                                                                                        |      |
| $[\text{Co}(\text{H}_2\text{O})(\text{dca})_2 \cdot \text{phz}]_n$   | 2.049                | $\mu_{1,5}$<br>2.080<br>2.086<br>$\mu_{1,3,5}$<br>2.213<br>2.121<br>2.163 | $\mu_{1,5}$<br>159.4<br>160.4<br>$\mu_{1,3,5}$<br>164.4<br>163.0<br>120.9<br>122.5 | 119.5(2)<br>116.4(2) | 7.4110                                                               | <b>dc</b><br>FCM and ZFCM suggested lack of long-range order weak intra network ferromagnetic coupling                                                                                                 | [31] |
| <b>Single <math>\mu_{1,5}</math> + double <math>\mu_{1,5}</math></b> |                      |                                                                           |                                                                                    |                      |                                                                      |                                                                                                                                                                                                        |      |
| $[\text{Co}(\text{phen})(\text{dca})_2]_n$                           | 2.134(1)<br>2.121(1) | 2.211(2)<br>2.108(2)<br>2.085(2)<br>2.135(2)                              | 134.0(1)<br>173.6(1)<br>145.1(1)<br>160.9(2)                                       | 120.1(2)<br>122.1(2) | 7.6455(6)<br>7.3282(5)                                               | <b>dc</b><br>$\chi T = 2.80 \text{ cm}^3 \cdot \text{K} \cdot \text{mol}^{-1}$ at 300 K<br>$\mu_{\text{eff}} = 4.77 \mu_B$<br>$\chi T = 1.82 \text{ cm}^3 \cdot \text{K} \cdot \text{mol}^{-1}$ at 2 K | [1]  |
| $[\text{Co}(2,9\text{-dmphen})(\text{dca})_2]_n$                     | 2.188(2)<br>2.171(2) | 2.149(2)<br>2.127(2)<br>2.087(2)                                          | 168.9(2)<br>146.9(2)<br>171.4(2)                                                   | 119.2(2)<br>120.5(2) | 7.4301(4)<br>7.7722(4)                                               | <b>dc</b><br>$\chi T = 2.85 \text{ cm}^3 \cdot \text{K} \cdot \text{mol}^{-1}$ at 300 K<br>$\mu_{\text{eff}} = 4.73 \mu_B$                                                                             | [1]  |

|                                                                            |                      |                                                                                |                                                                                |                      |                                                                                       |                                                                                                                                                                                                                                         |      |
|----------------------------------------------------------------------------|----------------------|--------------------------------------------------------------------------------|--------------------------------------------------------------------------------|----------------------|---------------------------------------------------------------------------------------|-----------------------------------------------------------------------------------------------------------------------------------------------------------------------------------------------------------------------------------------|------|
|                                                                            |                      | 2.110(2)                                                                       | 160.2(2)                                                                       |                      |                                                                                       | $\chi T = 1.57 \text{ cm}^3 \cdot \text{K} \cdot \text{mol}^{-1}$ at 2 K                                                                                                                                                                |      |
| $[\text{Co}(4,5\text{-dmphen})(\text{dca})_2]_n$                           | 2.127(1)<br>2.136(1) | 2.099(2)<br>2.097(2)<br>2.263(2)<br>2.096(2)                                   | 150.9(2)<br>167.1(2)<br>165.4(2)<br>136.1(2)                                   | 124.6(2)<br>120.0(2) | 7.9399(4)<br>7.3024(4)                                                                | <b>dc</b><br>$\chi T = 2.63 \text{ cm}^3 \cdot \text{K} \cdot \text{mol}^{-1}$ at 300 K<br>$\mu_{\text{eff}} = 4.59 \mu_B$<br>$\chi T = 1.55 \text{ cm}^3 \cdot \text{K} \cdot \text{mol}^{-1}$ at 2 K                                  | [1]  |
| $[\text{Co}(\text{biq})(\text{dca})_2]_n$                                  | 2.156(1)<br>2.173(1) | 2.091(1)<br>2.105(1)<br>2.117(1)<br>2.121(1)                                   | 174.5(1)<br>151.1(1)<br>146.4(1)<br>167.7(1)                                   | 117.6(1)<br>120.9(1) | 7.3764(4)<br>8.0434(5)                                                                | <b>dc</b><br>$\mu_{\text{eff}} = 4.98 \mu_B$ at 300 K<br>$\mu_{\text{eff}} = 3.1 \mu_B$ at 2 K<br>$D = 66.4 \text{ cm}^{-1}$<br>$E/D = 0.14$<br>$zJ = 0.88 \text{ cm}^{-1}$<br><br><b>ac</b><br>$U_{\text{eff}} = 2.77 \text{ cm}^{-1}$ | [5]  |
| $\{[\text{Co}_2(\text{bpm})(\text{dca})_4]_n \cdot \text{H}_2\text{O}\}_n$ | 2.165(2)<br>2.165(2) | <b>Double</b><br>2.098(3)<br>2.079(3)<br><b>Single</b><br>2.103(3)<br>2.103(3) | <b>Double</b><br>158.3(3)<br>160.1(3)<br><b>Single</b><br>160.2(3)<br>163.8(3) | 117.3<br>114.1       | <b>Double</b><br>7.201(1)<br><b>Single</b><br>8.299(1)                                | antiferromagnetic interactions                                                                                                                                                                                                          | [10] |
| $[\text{Co}_2(4\text{bpym})(\text{dca})_2]_n \cdot \text{H}_2\text{O}$     | 2.165(3)<br>2.167(3) | <b>Double</b><br>2.075(3)<br>2.096(3)<br><b>Single</b><br>2.114(4)<br>2.102(4) | <b>Double</b><br>158.6(3)<br>161.2(3)<br><b>Single</b><br>164.5(3)<br>158.8(3) | 117.9<br>120.9(4)    | <b>Double</b><br>7.220(2)<br><b>Single</b><br>8.288(2)<br><b>Ligand</b><br>(5.766(2)) | <b>dc</b><br>$\Theta = -42 \text{ K}$<br>$\mu_{\text{eff}} = 5.16 \mu_B$                                                                                                                                                                | [29] |
| $\{[\text{Ph}_4\text{P}]\{\text{Co}[\text{dca}]_3\}$                       | –                    | <b>Single</b><br>2.155<br>2.155                                                | <b>Double</b><br>161.8<br>159.6                                                | 118.8(2)<br>126.5(6) | <b>Double</b><br>7.4426                                                               | No magnetic ordering                                                                                                                                                                                                                    | [11] |

|                                                                                             |                      |                                                                                      |                                                                        |                      |                                                    |                                                                                                                                                                                                                                                             |      |
|---------------------------------------------------------------------------------------------|----------------------|--------------------------------------------------------------------------------------|------------------------------------------------------------------------|----------------------|----------------------------------------------------|-------------------------------------------------------------------------------------------------------------------------------------------------------------------------------------------------------------------------------------------------------------|------|
|                                                                                             |                      | <b>Double</b><br>2.118<br>2.118<br>2.114<br>2.114                                    | <b>Single</b><br>161.8<br>149.5                                        |                      | <b>Single</b><br>8.7948                            |                                                                                                                                                                                                                                                             |      |
| [Co(ptzda) <sub>2</sub> (dca)] <sub>n</sub>                                                 | 2.131(3)<br>2.142(2) | 2.150(3)<br>2.138(3)<br>2.107(3)<br>2.104(3)                                         | 167.6(3)<br>163.0(2)<br>163.8(3)<br>158.9(2)                           | 123.5(3)<br>118.3(3) | 7.343(4)<br>8.498(5)                               | undiscussed                                                                                                                                                                                                                                                 | [13] |
| {(Ph <sub>4</sub> As)[Co(dca) <sub>3</sub> ]} <sub>n</sub>                                  | –                    | <b>Double</b><br>2.121<br>2.121<br>2.111<br>2.111<br><b>Single</b><br>2.140<br>2.140 | <b>Double</b><br>162.0<br>157.0<br><br><b>Single</b><br>168.9<br>157.5 | 118.6(2)<br>124.0(3) | <b>Double</b><br>7.4416<br><b>Single</b><br>8.7500 | <b>dc</b><br>$\mu_{\text{eff}} = 3.80\mu_{\text{B}}$ at 4.2 K<br>small negative $\Theta$<br>no long-range magnetic order                                                                                                                                    | [25] |
| [Co(dmpzm)(dca) <sub>2</sub> ] <sub>n</sub>                                                 | 2.180(2)<br>2.164(2) | 2.102(2)<br>2.133(2)<br>2.126(2)<br>2.127(2)                                         | 175.6(2)<br>159.5(2)<br>158.6(2)<br>153.4(2)                           | 123.7(3)<br>120.3(3) | 7.4900(8)<br>8.5727(8)                             | <b>dc</b><br>$\chi T = 3.44 \text{ cm}^3 \cdot \text{K} \cdot \text{mol}^{-1}$ at 300 K<br>$\chi T = 2.35 \text{ cm}^3 \cdot \text{K} \cdot \text{mol}^{-1}$ at 2 K<br>$C = 3.67 \text{ cm}^3 \cdot \text{mol}^{-1} \text{K}$<br>$\theta = -18.8 \text{ K}$ | [27] |
| <b>Single <math>\mu_{1,5}</math></b>                                                        |                      |                                                                                      |                                                                        |                      |                                                    |                                                                                                                                                                                                                                                             |      |
| {[Co(dca) <sub>2</sub> (Mepyz) <sub>2</sub> ] <sub>n</sub> ·H <sub>2</sub> O} <sub>n</sub>  | 2.155<br>2.155       | 2.121<br>2.121<br>2.101<br>2.101                                                     | 157.0<br>168.3<br>157.0<br>168.3                                       | 125.9(2)<br>125.9(2) | 8.3186<br>8.3186                                   | <b>dc</b><br>$\mu_{\text{eff}} = 4.95\mu_{\text{B}}$ at 300K<br>$\mu_{\text{eff}} = 3.58\mu_{\text{B}}$ at 2 K                                                                                                                                              | [2]  |
| [Co(4NOpy) <sub>2</sub> (dca) <sub>2</sub> (CH <sub>3</sub> CN) <sub>2</sub> ] <sub>n</sub> | 2.149(3)             | 2.106(3)                                                                             | 166.36                                                                 | 119.24               | 8.125(1)                                           | –                                                                                                                                                                                                                                                           | [3]  |

|                                                                                     |                             |                                              |                                              |                        |                      |                                                                                                                                                                                                                                                                                                                                                                                                                                                    |     |
|-------------------------------------------------------------------------------------|-----------------------------|----------------------------------------------|----------------------------------------------|------------------------|----------------------|----------------------------------------------------------------------------------------------------------------------------------------------------------------------------------------------------------------------------------------------------------------------------------------------------------------------------------------------------------------------------------------------------------------------------------------------------|-----|
|                                                                                     | 2.162(3)                    | 2.111(3)<br>2.107(2)<br>2.110(3)             | 162.72<br>164.03<br>167.09                   | 121.85                 | 8.156(1)             |                                                                                                                                                                                                                                                                                                                                                                                                                                                    |     |
| $[\text{Co}(\text{4NOpy})_2(\text{dca})_2]_n$                                       | 2.156(5)<br>2.167(5)        | 2.107(5)<br>2.100(6)<br>2.102(5)<br>2.097(6) | 162.2(7)<br>161.4(6)<br>164.7(6)<br>159.9(5) | 119.0(8)<br>119.4(9)   | 7.822(1)<br>7.840(1) | <b>dc</b><br>$\chi T = 3.4 \text{ cm}^3 \cdot \text{K} \cdot \text{mol}^{-1}$ at 300 K<br>$\chi T = 2.5 \text{ cm}^3 \cdot \text{K} \cdot \text{mol}^{-1}$ at ca. 30 K<br>$J_{\text{Co-NOpy}}/k_B = -0.8 \text{ K}$<br>$ D /k_B = 185 \text{ K}$<br>zero-field-cooled magnetization (ZFCM); field-cooled magnetization (FCM); remnant magnetization (RM) suggested the formation of 2-D (or 3-D) canted antiferromagnets below $T_N = 6 \text{ K}$ | [3] |
| $\{[\text{Co}(\text{NH}_2\text{pyz})_2(\text{dca})_2] \cdot \text{H}_2\text{O}\}_n$ | 2.171<br>2.171              | 2.110<br>2.110<br>2.119<br>2.119             | 173.7<br>169.8                               | 122.31(2)<br>122.31(2) | 8.2107(3)            | <b>dc</b><br>$\chi T = 3.32 \text{ cm}^3 \text{ mol}^{-1} \text{K}$ at 300 K<br>$\chi T = 1.98 \text{ cm}^3 \text{ mol}^{-1} \text{K}$ at 2 K<br>$D = +95.4 \text{ cm}^{-1}$<br>$E/D = 0.025$<br><b>ac</b><br>$U_{\text{eff}} = 24.5\text{--}28.2 \text{ cm}^{-1}$<br>$\tau_0 = 1.19\text{--}2.5 \cdot 10^{-7} \text{ s}$                                                                                                                          | [6] |
| $[\text{Co}_3(\text{HOpyz})_5(\text{dca})_6(\text{H}_2\text{O})_2]_n$               | Co1<br>2.203(2)<br>2.221(2) | Co(1)<br>2.071(2)<br>2.056(2)<br>2.078(2)    | 167.2(2)<br>174.0(2)<br>159.4<br>166.4       | 123.9(3)<br>126.8(3)   | 8.4746(4)            | <b>dc</b><br>$\chi T = 10.46 \text{ cm}^3 \text{ mol}^{-1} \text{K}$ at 300 K<br>$\chi T = 5.08 \text{ cm}^3 \text{ mol}^{-1} \text{K}$ at 2 K<br>$D = +76.5 \text{ cm}^{-1}$                                                                                                                                                                                                                                                                      | [6] |



|                                                                      |                         |                                                                  |                      |                      |                        |                                                                                                                                                                                                                                                                                      |     |
|----------------------------------------------------------------------|-------------------------|------------------------------------------------------------------|----------------------|----------------------|------------------------|--------------------------------------------------------------------------------------------------------------------------------------------------------------------------------------------------------------------------------------------------------------------------------------|-----|
|                                                                      | Co(2)<br>2.187<br>2.187 | <b>2.165(2) h20</b><br>Co(2)<br>2.114<br>2.114<br>2.073<br>2.073 |                      |                      |                        | <b>ac</b><br>$U_{\text{eff}} = 1 \text{ cm}^{-1}$                                                                                                                                                                                                                                    |     |
| [Co(atz) <sub>2</sub> (dca) <sub>2</sub> ] <sub>n</sub>              | 2.168<br>2.168          | 2.097<br>2.097<br>2.089<br>2.089                                 |                      |                      | 8.0415                 | <b>dc</b><br>$\chi T = 2.77 \text{ cm}^3 \text{ mol}^{-1} \text{ K}$ at 300 K<br>$\chi T = 1.78 \text{ cm}^3 \text{ mol}^{-1} \text{ K}$ at 2 K<br><b>ac</b><br>$U_{\text{eff}} = 5.1 \text{ cm}^{-1}$<br>$\tau_0 = 1.7 \cdot 10^{-6} \text{ s}$                                     | [7] |
| [Co(bim) <sub>2</sub> (dca) <sub>2</sub> ] <sub>n</sub>              | 2.128(3)<br>2.134(3)    | 2.190(3)<br>2.220(3)<br>2.209(3)<br>2.219(3)                     | 169.5(3)<br>158.3(3) | 125.1(4)<br>123.8(4) | 8.927(2)<br>8.968(2)   | <b>dc</b><br>$\chi T = 3.04 (2) \text{ cm}^3 \text{ mol}^{-1} \text{ K}$ at 300K<br>$\chi T = 1.71 \text{ cm}^3 \text{ mol}^{-1} \text{ K}$ at 2K<br>$ D  = 74.3 \text{ cm}^{-1}$<br><b>ac</b><br>$\tau_0 = 1.54 \cdot 10^{-6} \text{ s}$<br>$U_{\text{eff}} = 5.33 \text{ cm}^{-1}$ | [8] |
| [Co(bmim) <sub>2</sub> (dca) <sub>2</sub> ] <sub>n</sub>             | 2.156(3)<br>2.163(3)    | 2.127(3)<br>2.153(3)<br>2.152(3)<br>2.145(3)                     | 169.7(3)<br>160.2(3) | 124.3(4)<br>124.3(4) | 8.7110(5)<br>8.7158(5) | <b>dc</b><br>$\chi T = 3.28 \text{ cm}^3 \text{ mol}^{-1} \text{ K}$ at 300K<br>$\chi T = 1.31 \text{ cm}^3 \text{ mol}^{-1} \text{ K}$ at 2K<br><b>ac</b><br>$\tau_0 = 0.63 \cdot 10^{-6} \text{ s}$<br>$U_{\text{eff}} = 13.81 \text{ cm}^{-1}$<br>$ D  = 75.8 \text{ cm}^{-1}$    | [8] |
| [Co(H <sub>2</sub> O) <sub>2</sub> (dca) <sub>2</sub> ] <sub>n</sub> | 2.054<br>2.054          | 2.122<br>2.122<br>2.125                                          | 157.6<br>173.1       | 119.8(8)             | 7.895                  | <b>dc</b><br>$\chi T = 2.86 \text{ cm}^3 \text{ mol}^{-1} \text{ K}$ at 300K                                                                                                                                                                                                         | [9] |

|                                                                                       |                                        |                                  |                |           |        |                                                                                                                                                                                                                                                                    |      |
|---------------------------------------------------------------------------------------|----------------------------------------|----------------------------------|----------------|-----------|--------|--------------------------------------------------------------------------------------------------------------------------------------------------------------------------------------------------------------------------------------------------------------------|------|
|                                                                                       |                                        | 2.125                            |                |           |        |                                                                                                                                                                                                                                                                    |      |
| [Co(NH <sub>3</sub> ) <sub>2</sub> (dca) <sub>2</sub> ] <sub>n</sub>                  | 2.137<br>2.137                         | 2.120<br>2.120<br>2.135<br>2.135 | 173.6<br>167.0 | 120.6(2)  | 8.362  | <b>dc</b><br>$\chi T = 2.89 \text{ cm}^3 \cdot \text{K} \cdot \text{mol}^{-1}$ at 300K<br>( $\mu_{\text{eff}} = 4.81 \mu_B$ )<br>$\chi T = 1.60 \text{ cm}^3 \cdot \text{K} \cdot \text{mol}^{-1}$ at 2K                                                           | [12] |
| [Co(bzim) <sub>2</sub> (dca) <sub>2</sub> ] <sub>n</sub>                              | 2.149<br>2.149                         | 2.115<br>2.115<br>2.143<br>2.143 | 157.1<br>147.3 | 118.6(2)  | 7.623  | <b>dc</b><br>$\chi T = 3.01 \text{ cm}^3 \cdot \text{K} \cdot \text{mol}^{-1}$ at 300K<br>$\chi T = 1.21 \text{ cm}^3 \cdot \text{K} \cdot \text{mol}^{-1}$ at 2K<br>$\Theta = 17.14 \text{ K}$<br>$C = 3.17 \text{ cm}^3 \text{ K mol}^{-1}$                      | [18] |
| [Co(dat) <sub>2</sub> (dca) <sub>2</sub> ] <sub>n</sub>                               | 2.122<br>2.122                         | 2.135<br>2.135<br>2.129<br>2.129 | 142.4<br>142.2 | 119.9(5)  | 7.2744 | undiscussed                                                                                                                                                                                                                                                        | [20] |
| {[Co(2-abim) <sub>2</sub> (dca) <sub>4</sub> ]} <sub>n</sub>                          | 2.117<br>2.117<br>Pojedynczy<br>mostek | 2.160<br>2.160<br>2.152<br>2.152 | 143.4<br>159.2 | 119.4(1)  | 8.1858 | undiscussed                                                                                                                                                                                                                                                        | [21] |
| [Co(dmdpy)(dca) <sub>2</sub> ] <sub>n</sub>                                           | 2.142<br>2.142                         | 2.095<br>2.095<br>2.114<br>2.114 | 163.8<br>166.7 | 124.1(5)  | 8.1016 | <b>dc</b><br>$\chi T = 3.34 \text{ cm}^3 \cdot \text{K} \cdot \text{mol}^{-1}$ at 300K<br>$\chi T = 2.03 \text{ cm}^3 \cdot \text{K} \cdot \text{mol}^{-1}$ at 2K<br>$C = 4.33 \text{ emol mol}^{-1}$<br>$\Theta = -4.62 \text{ K}$<br>$D = 95.37 \text{ cm}^{-1}$ | [22] |
| {[Co(H <sub>2</sub> O) <sub>2</sub> (dca) <sub>2</sub> ](2,3,5,6-tmpdo)} <sub>n</sub> | 2.097<br>2.097                         | 2.097<br>2.100                   | 176.1<br>177.3 | 120.9(4)  | 8.3363 | <b>dc</b><br>$\chi T = 2.89 \text{ cm}^3 \cdot \text{K} \cdot \text{mol}^{-1}$ at 300K<br>$\chi T = 2.00 \text{ cm}^3 \cdot \text{K} \cdot \text{mol}^{-1}$ at 2K<br>$\Theta = -11.5 \text{ K}$<br>$C = 3.01 \text{ cm}^3 \text{ mol}^{-1}$                        | [23] |
| [Co(DMSO) <sub>2</sub> (dca) <sub>2</sub> ] <sub>n</sub>                              | 2.0868                                 | 2.1151                           | 162.12         | 117.84(9) | 7.6640 | <b>dc</b>                                                                                                                                                                                                                                                          | [26] |

|                                                                                              |                                                                                  |                                                                              |                          |          |                                                 |                                                                                                                                                                                                                                                |      |
|----------------------------------------------------------------------------------------------|----------------------------------------------------------------------------------|------------------------------------------------------------------------------|--------------------------|----------|-------------------------------------------------|------------------------------------------------------------------------------------------------------------------------------------------------------------------------------------------------------------------------------------------------|------|
|                                                                                              | 2.0868                                                                           | 2.1151<br>2.1108<br>2.1108                                                   | 162.34                   |          |                                                 | $\chi T = 2.30 \text{ cm}^3 \cdot \text{K} \cdot \text{mol}^{-1}$ at 300K<br>$\Theta = -10.80 \text{ K}$<br>$C = 2.29 \text{ cm}^3 \text{ mol}^{-1}$                                                                                           |      |
| $[\text{Co}(2\text{-Mebzim})(\text{dca})_2]_n$                                               | 2.1513(18)<br>2.1513(18)                                                         | 2.1445(19)<br>2.1445(19)<br>2.1405(19)<br>2.1405(19)                         | 151.16(18)<br>160.73(19) | 119.7(2) | 8.273(9)                                        | <b>dc</b><br>$D = 65(20) \text{ cm}^{-1}$<br><b>ac</b> and <b>FIRMS</b> measurements                                                                                                                                                           | [28] |
| <b>single <math>\mu_{1,5}</math> + ligand</b>                                                |                                                                                  |                                                                              |                          |          |                                                 |                                                                                                                                                                                                                                                |      |
| $\{[\text{Co}(\text{btrm})_2(\text{dca})]\text{ClO}_4\}_n$                                   | Co1<br>2.140(6)<br>2.146(6)<br>2.142(6)<br>2.150(6)<br><br>Co2<br>2.136<br>2.157 | Co1<br>single<br>2.072(5)<br>2.082(5)<br><br>Co2<br>single<br>2.085<br>2.085 | 160.3(6)<br>164.4        | 122.6(9) | Co1...Co1<br>8.894(4)<br><br>Co2...Co2<br>8.526 | <b>dc</b><br>$\mu_{\text{eff}} = 4.27 \mu_B$ at 300K<br>$\mu_{\text{eff}} = 2.01 \mu_B$ at 2 K                                                                                                                                                 | [16] |
| $\{[\text{Co}(\text{DPNDI})(\text{dca})]_n \cdot 2n\text{DMF} \cdot n\text{H}_2\text{O}\}_n$ | 2.143<br>2.143                                                                   | 2.116<br>2.116<br>2.125<br>2.125                                             | 160.8<br>159.7           | 119.2(1) | 7.3769                                          | <b>dc</b><br>$\chi T = 4.21 \text{ cm}^3 \cdot \text{K} \cdot \text{mol}^{-1}$ at 300K<br>$\chi T = 2.73 \text{ cm}^3 \cdot \text{K} \cdot \text{mol}^{-1}$ at 2K<br>$\Theta = -20.09 \text{ K}$<br>$C = 4.47 \text{ cm}^3 \text{ K mol}^{-1}$ | [19] |
| $[\text{Co}(\text{bnzd})(\text{dca})_2]_n$                                                   | 2.190<br>2.190                                                                   | 2.099<br>2.099<br>2.117<br>2.117                                             | 153.7<br>161.4           | 118.2(2) | 7.2931                                          | <b>dc</b><br>$\chi T = 3.3 \text{ cm}^3 \cdot \text{K} \cdot \text{mol}^{-1}$ at 300K<br>$\chi T = 1.0 \text{ cm}^3 \cdot \text{K} \cdot \text{mol}^{-1}$ at 2K<br>$J = -3.38 \text{ K } (-4.86 \text{ cm}^{-1})$                              | [24] |
| <b>Three types of bridges</b>                                                                |                                                                                  |                                                                              |                          |          |                                                 |                                                                                                                                                                                                                                                |      |
| $[\text{Co}(3\text{-bpo})(\text{dca})_2]_n$                                                  | 2.175(5)                                                                         | 2.091(5)                                                                     | 154.3(4)                 | 121.8(5) | 7.383(3)                                        | <b>dc</b>                                                                                                                                                                                                                                      | [15] |

|                                                                                |                                                  |                                                                |                                                        |                      |           |                                                                                                                                                                                                                                                                                                                                                          |      |
|--------------------------------------------------------------------------------|--------------------------------------------------|----------------------------------------------------------------|--------------------------------------------------------|----------------------|-----------|----------------------------------------------------------------------------------------------------------------------------------------------------------------------------------------------------------------------------------------------------------------------------------------------------------------------------------------------------------|------|
|                                                                                | 2.160(5)                                         | 2.136(5)<br>2.103(4)<br>2.114(4)                               | 164.1(4)<br>161.6(4)<br>156.4(4)                       | 119.1(4)             | 7.587(2)  | $\chi T = 3.5 \text{ cm}^3 \cdot \text{K} \cdot \text{mol}^{-1}$ at 300K<br>$\chi T = 2.1 \text{ cm}^3 \cdot \text{K} \cdot \text{mol}^{-1}$ at 12K<br>in 12-2K region presence of a small amount of ferromagnetic or canted antiferromagnetic-ordered impurities, likely, $\alpha$ - or $\beta$ -[Co(dca) <sub>2</sub> ] with T <sub>c</sub> at 9-10 K. |      |
| <b>Dca as a co-ligand</b>                                                      |                                                  |                                                                |                                                        |                      |           |                                                                                                                                                                                                                                                                                                                                                          |      |
| {[Co(pypypz) <sub>2</sub> (dca)](OH)(gly) <sub>2</sub> ] <sub>n</sub>          | 2.182<br>2.163                                   | 2.163<br>2.182<br>2.175<br>2.175                               | 166.3<br>171.1<br>173.6<br>171.1                       | 129.0(5)<br>129.0(5) | 14.537    | undiscussed                                                                                                                                                                                                                                                                                                                                              | [14] |
| [Co(pypypz) <sub>2</sub> (dca) <sub>2</sub> ] <sub>n</sub>                     | 2.158<br>2.171<br><br>Polimer<br>przez<br>ligand | 2.158<br>2.171<br>2.088<br>2.088<br>Dca nie jest<br>łącznikiem | 160.7                                                  | 125.3(7)             | 16.465    | undiscussed                                                                                                                                                                                                                                                                                                                                              | [14] |
| {[Co(pypypz) <sub>2</sub> (dca) <sub>2</sub> ](H <sub>2</sub> O)] <sub>n</sub> | 2.129<br>2.129<br>Polimer<br>przez<br>ligand     | 2.057<br>2.057<br>2.127<br>2.127<br>Dca nie jest<br>łącznikiem | 168.2                                                  | 121.9(5)             | 17.535    | undiscussed                                                                                                                                                                                                                                                                                                                                              | [14] |
| <b>different</b>                                                               |                                                  |                                                                |                                                        |                      |           |                                                                                                                                                                                                                                                                                                                                                          |      |
| {BeTriMe[Co(dca) <sub>3</sub> (H <sub>2</sub> O)]] <sub>n</sub>                | 2.086(4)                                         | single<br>2.082(3)<br>2.118(3)<br>2.103(3)<br>2.091(3)         | single<br>162.4(4)<br>156.4(3)<br>167.5(3)<br>155.8(4) | 118.5(9)<br>118.2(4) | 8.5297(6) | <b>dc</b><br>C = 1.55(1) emu mol <sup>-1</sup> K<br>Θ = -15.0(4) K<br>μ <sub>eff</sub> = 3.52(1) μ <sub>B</sub><br>weak ferromagnetism                                                                                                                                                                                                                   | [17] |

|  |  |                     |                                                      |  |  |  |  |
|--|--|---------------------|------------------------------------------------------|--|--|--|--|
|  |  | $\mu_3$<br>2.225(4) | 120.9(8)<br>$\mu_3$<br>Co-NC<br>122.4(3)<br>119.3(3) |  |  |  |  |
|--|--|---------------------|------------------------------------------------------|--|--|--|--|

**phen** = 1,10-phenanthroline; **2,9-dmphen** = 2,9-dimethylphenanthroline; **4,7-dmphen** = 4,7-dimethylphenanthroline; **Mepyz** = methylpyrazine; **4NOpy** = 4(N-tert-butyloxylamino)pyridine; **pzdo** = pyrazinedioxide; **mpdo** = 2-methyl pyrazine dioxide; **biq** = 2,2'-biquinoline; **NH<sub>2</sub>pyz** = 2-aminopyrazine; **HOpyz** = 2-hydroxypyrazine; **atz** = 2-amino 1,3,5-triazine; **bim** = 1-benzylimidazole; **bmim** = 1-benzyl-2-methylimidazole; **L** = pyridinium-4-olate; **bpm** = 2,2-bipyrimidine; **NH<sub>3</sub>** = ammonia; **pzda** = 2,4-diamino-6-pyridyl-1,3,5-triazine; **3-bpo** = 2,5-bis(3-pyridyl)-1,3,4-oxadiazole; **btrm** = 1,2-bis(1,2,4-triazole-1-yl)methane, **bzim** = benzimidazole; **dpndi** = N,N'-di(3-pyridyl)-1,4,5,8-naphthalenetetracarboxydiimide; **dat** = 1,5-diaminotetrazole; **2-abim** = 2-aminobenzimidazole; **dmdpy** = 5,5'-dimethyl-2,2'-dipyridine; **2,5-dmpdo** = 2,5-dimethylpyrazine-dioxide; **2,3,5,6-tmpdo** = 2,3,5,6-tetramethylpyrazine dioxide; **bnzd** = benzidine; **dmpzm** = bis(3,5-dimethylpyrazolyl)methane; **phz** = phenazine; **pyppyz** = bis[3,5-dimethyl-4-(49-pyridyl)pyrazol-1-yl]methane; **ptzda** = 2,4-diamino-6-pyridyl-1,3,5-triazine

#### References for 2D Co(II) coordination polymers:

1. Armentano, D.; De Munno, G.; Guerra, F.; Julve, M.; Lloret, F. Ligand Effects on the Structures of Extended Networks of Dicyanamide-Containing Transition-Metal Ions. *Inorg. Chem.* **2006**, *45*, 4626–4636.
2. Kutasi, A.M.; Harris, A.R.; Batten, S.R.; Moubaraki, B.; Murray, K.S. Coordination Polymers of Dicyanamide and Methylpyrazine: Syntheses, Structures, and Magnetic Properties. *Cryst. Growth Des.* **2004**, *4*, 605–610.
3. Ogawa, H.; Mori, K.; Murashima, K.; Karasawa, S.; Koga, N. One-, Two-, and Three-Dimensional Heterospin Complexes Consisting of 4-(N-tert-Butyloxylamino)pyridine (4NOpy), Dicyanamide Ion (DCA), and 3d Metal Ions: Crystal Structures and Magnetic Properties of [M<sup>II</sup>(4NOpy)<sub>x</sub>(DCA)<sub>y</sub>(CH<sub>3</sub>CN)<sub>z</sub>]<sub>n</sub> (M = Mn, Co, Ni, Cu, Zn). *Inorg. Chem.* **2016**, *55*, 717–728.
4. Sun, H.L.; Gao, S.; Ma, B.Q.; Su, G. Long-Range Ferromagnetic Ordering in Two-Dimensional Coordination Polymers Co[N(CN)<sub>2</sub>]<sub>2</sub>(L) [L = Pyrazine Dioxide (pzdo) and 2-Methyl Pyrazine Dioxide (mpdo)] with Dual  $\mu$ - and  $\mu_3$ -[N(CN)<sub>2</sub>] Bridges. *Inorg. Chem.* **2003**, *42*, 5399–5404.

5. Kliuikov, A.; Bukrynov, O.; Čižmár, E.; Váhovská, L.; Vitushkina, S.; Samoľová, E.; Potočňák, I. Syntheses, structures and magnetic properties of two isostructural dicyanamide-bridged 2D polymers. *New J. Chem.* **2021**, *45*, 7117–7128.
6. Palion-Gazda, J.; Świtlicka, A.; Choroba, K.; Machura, B.; Kruszynski, R.; Julve, M. Influence of the pyrazine substituent on the structure and magnetic properties of dicyanamide-bridged cobalt(II) complexes. *Dalton Trans.* **2019**, *48*, 17266–17280.
7. Palion-Gazda, J.; Klemens, T.; Machura, B.; Vallejo, J.; Lloret, F.; Julve, M. Single ion magnet behaviour in a two-dimensional network of dicyanamide-bridged cobalt(II) ions. *Dalton Trans.* **2015**, *44*, 2989–2992.
8. Świtlicka-Olszewska, A.; Palion-Gazda, J.; Klemens, T.; Machura, B.; Vallejo, J.; Cano, J.; Lloret, F.; Julve, M. Single-ion magnet behaviour in mononuclear and two-dimensional dicyanamide-containing cobalt(II) complexes. *Dalton Trans.* **2016**, *45*, 10181–10193.
9. Zheng, L. Syntheses, Crystal Structures, Magnetic Behaviours, and Thermal Properties of Three Hydrogen-Bonding Networks Containing Dicyanamide and 4-Hydroxypyridine. *J. Chem.* **2013**, *2013*, 291703.
10. Martin, S.; Barandika, M.G.; Cortes, R.; Ruiz de Larramendi, J.I.; Urtiaga, M.K.; Lezama, L.; Arriortua, M.I.; Rojo, T. The 2D and 3D Compounds  $[M_2bpm(dca)_4] \cdot nH_2O$  ( $M=Ni, Zn$ ; bpm = bipyrimidine; dca = dicyanamide;  $n=0, 1$ ) Magnetic Properties. *Eur. J. Inorg. Chem.* **2001**, 2107–2112.
11. Raebiger, J.W.; Manson, J.L.; Sommer, R.D.; Geiser, U.; Rheingold, A.L.; Miller, J.S. 1-D and 2-D Homoleptic Dicyanamide Structures,  $[Ph_4P]_2\{Co^II[N(CN)_2]_4\}$  and  $[Ph_4P]\{M[N(CN)_2]_3\}$  ( $M=Mn, Co$ ) *Inorg. Chem.* **2001**, *40*, 2578–2581.
12. Mann, M.; Mroz, D.; Henrich, L.; Houben, A.; van Leusen, J.; Dronskowski, R. Syntheses and Characterization of Diammine–Nickel/Cobalt(II)–Bisdicyanamide  $M(NH_3)_2[N(CN)_2]_2$  with  $M=Ni$  and  $Co$ . *Inorg. Chem.* **2019**, *58*, 7803–7811.
13. Li, J.Y.; Xie, M.J.; Jiang, J.; Chang, Q.W.; Ye, Q.S.; Liu, W.P.; Chen, J.L.; Ning, P. Synthesis and Crystal Structure of Two Polydimensional Molecular Architectures from Cobalt(II), Copper(II) Complexes of 2,4-Diamino-6-pyridyl-1,3,5-triazine. *Asian J. Chem.* **2014**, *26*, 419–422.
14. Du, M.; Wang, X.-G.; Zhang, Z.-H.; Tang, L.-F.; Zhao, X.-J. Solvent-directed layered Co(II) coordination polymers with unusual solid-state properties: from a nanoporous framework to the dense polythreading 3-D aggregation. *CrystEngComm* **2006**, *8*, 788–793.
15. Du, M.; Wang, Q.; Li, C.-P.; Zhao, X.J.; Ribas, J. Coordination Assemblies of  $Co^{II}/Cu^{II}/Zn^{II}/Cd^{II}$  with 2,5-Bipyridyl-1,3,4-Oxadiazole and Dicyanamide Anion: Structural Diversification and Properties. *Cryst.GrowthDes.* **2010**, *10*, 3285–3296.
16. Chen, X.Y.; Cheng, P.; Yan, S.-P.; Liao, D.-Z.; Jiang, Z.-H. Grid-like Cobalt(II) Layered Complex with an Unprecedented Double 1,2-Bis(1,2,4-triazole-1-yl)methane Bridges. *Z. Anorg. Allg. Chem.* **2005**, *631*, 3104–3107.
17. Mączka, M.; Gagor, A.; Stroppa, A.; Gonçalves, J. N.; Zaręba, J. K.; Stefańska, D.; Pikul, A.; Drozd, M.; Sieradzki, A. Two-dimensional metal dicyanamide frameworks of  $BeTriMe[M(dca)_3(H_2O)]$  ( $BeTriMe$  = benzyltrimethylammonium; dca = dicyanamide;  $M=Mn^{2+}, Co^{2+}, Ni^{2+}$ ): coexistence of polar and magnetic orders and nonlinear optical threshold temperature sensing. *J. Mat. Chem. C* **2020**, *8*, 11735–11747.
18. Wang, S.; Wang, L.; Li, B.; Zhang, Y. Synthesis, Structure and Magnetic Properties of a New Two-dimensional (4,4) Network Cobalt Coordination Polymer with Dicyanamide and Benzimidazole Ligands. *J. Chem. Crystallogr.* **2009**, *39*, 221–224.

19. Xu, W.-J.; Chen, K.-P.; Zhang, Y.; Ma, Y.; Li, Q.-W.; Wang, Q.-L. Two new Co(II) coordination polymers based on redox-active ligands: Structure, Chromism and Magnetism. *J. Mol. Struct.* **2021**, 1231, 129948.
20. Xu, Y.; Wang, Y.; Zhong, Y.; Lei, G.; Li, Z.; Zhang, J.; Zhang, T. High-Energy Metal–Organic Frameworks with a Dicyanamide Linker for Hypergolic Fuels. *Inorg. Chem.* **2021**, 60, 5100–5106.
21. Das, A.; Bhattachary, B.; Maity, D. K.; Halder, A.; Ghoshal, D. Construction of five dicyanamide based coordination polymers with diverse dimensionality: Synthesis, characterization and photoluminescence study. *Polyhedron* **2016**, 117, 585–591.
22. Lopes, L.B.; Correa, C.C.; Guedes, G.P.; Vaz, M.G.F.; Diniz, R.; Machado, F.C. Two new coordination polymers involving Mn(II), Co(II), dicyanamide anion and the nitrogen ligand 5,5'-dimethyl-2,2'-dipyridine: Crystal structures and magnetic properties. *Polyhedron* **2013**, 50, 16–21.
23. Sun, H.-L.; Wang, Z.-M.; Gao, S. Synthesis, Crystal Structures, and Magnetism of Cobalt Coordination Polymers Based on Dicyanamide and Pyrazine-dioxide Derivatives. *Inorg. Chem.* **2005**, 44, 2169–2176.
24. Khan, S.; Roy, S.; Bhar, K.; Ghosh, R.; Lin, C.-H.; Ribas, J.; Ghosh, B.K. Syntheses, structures and magnetic properties of two neutral coordination polymers of cobalt(II) containing a tailored aromatic diamine and pseudohalides as bridging units: Control of dimensionality by varying pseudohalide. *Inorg.Chim. Acta* **2013**, 398, 40–45.
25. van der Werff, P.M.; Batten, S.R.; Jensen, P.; Moubaraki, B.; Murray, K.S.; Tan, E.H.-K. Structure and magnetism of anionic dicyanamidometallate extended networks of types  $(\text{Ph}_4 \text{ As})[\text{M}^{\text{II}}(\text{dca})_3]$  and  $(\text{Ph}_4 \text{ As})_2 [\text{M}_2^{\text{II}}(\text{dca})_6(\text{H}_2\text{O})] \cdot \text{H}_2\text{O} \cdot x\text{CH}_3\text{OH}$ , where  $\text{dca}=\text{N}(\text{CN})_2^-$  and  $\text{M}^{\text{II}}=\text{Co}, \text{Ni}$ ). *Polyhedron* **2001**, 20, 1129–1136.
26. Rajan, D.; Quintero, P. A.; Abboud, K. A.; Meisel, M.W.; Talham, D. R. Structural and magnetic properties of four layered dicyanamide-based coordination polymers:  $\text{M}\{\text{N}(\text{CN})_2\}_2(\text{DMSO})_2$ ,  $[\text{M} = \text{Mn}, \text{Fe}, \text{Co}, \text{Ni}]$ . *Polyhedron* **2013**, 66, 142–146.
27. Li, Q.Y.; Zhang, W.H.; Li, H.X.; Tang, X.Y.; Lang, J.P.; Zhang, Y.; Wang, X.Y.; Gao, S. Construction of a Novel 2D Polymer  $[\text{Co}(\text{dmpzm})(\text{dca})_2]_\infty$  from Reaction of a Mononuclear Complex  $[\text{Co}(\text{dmpzm})\text{Cl}_2]$  with Sodium Dicyanamide (dca) [dmpzm=bis(3,5-dimethylpyrazolyl)methane]. *Chin. J. Chem.* **2006**, 24, 1716–1720.
28. Świtlicka, A.; Bieńko, D. C.; Machura, B.; Rajnák, C.; Bieńko, A.; Kozieł, S.; Boča, R.; Ozarowski, A.; Ozerov, M. Non-traditional thermal behavior of Co(II) coordination networks showing slow magnetic relaxation. *Inorg. Chem. Front.* **2021**, 8, 4356–4366.
29. Marshall, S.R.; Incarvito, C.D.; Manson, J.L.; Rheingold, A.L.; Miller, J.S. Synthesis, Structure, and Magnetic Properties of  $\text{Co}_2\{[\text{N}(\text{CN})_2]_4\text{bpym}\} \cdot \text{H}_2\text{O}$  and  $\text{M}\{[\text{N}(\text{CN})_2]_2\text{bpym}\} \cdot \text{H}_2\text{O}$  ( $\text{M} = \text{Mn}, \text{Fe}, \text{Co}$ ; bpym = 2,2'-Bipyrimidine) *Inorg. Chem.* **2000**, 39, 1969–1973.
30. Kutasi, A. M.; Batten, S. R.; Moubaraki, B.; Murray, K. S. New 2D coordination polymers containing both bi- and tri-dentate dicyanamide bridges and intercalated phenazine. *J. Chem. Soc., Dalton Trans.* **2002**, 819–821.

**Table S6.** Magneto-structural data for three-dimensional dca-Co(II) coordination polymer

| Compound                                                   | Co–N <sub>ligand</sub><br>[Å] | Co–N <sub>DCA</sub><br>[Å]                                           | Angles<br>[°]                                                                   |                                | Co···Co<br>through<br>dca or<br>(ligand)<br>[Å] | Magnetism                                                                                                       | Ref  |
|------------------------------------------------------------|-------------------------------|----------------------------------------------------------------------|---------------------------------------------------------------------------------|--------------------------------|-------------------------------------------------|-----------------------------------------------------------------------------------------------------------------|------|
|                                                            |                               |                                                                      | Co–NC <sub>(dca)</sub>                                                          | C–N–C <sub>(dca)</sub>         |                                                 |                                                                                                                 |      |
| No co-ligand                                               |                               |                                                                      |                                                                                 |                                |                                                 |                                                                                                                 |      |
| [TPrA][Co(dca) <sub>3</sub> ] <sub>n</sub><br>4 polymorphs | –                             | 2.106(3)<br>2.116(3)<br>2.119(4)<br>2.130(3)<br>2.145(3)<br>2.153(3) | Co–NC<br>160.5(4)<br>163.4(4)<br>164.6(3)<br>170.6(4)<br>172.7(4)<br>176.6(5)   | 122(2)<br>122.1(4)<br>123.2(6) | 8.1262(7)                                       | undiscussed                                                                                                     | [1]  |
| α-[Co(dca) <sub>2</sub> ] <sub>n</sub>                     | –                             | μ <sub>1,5</sub><br>2.092<br>2.092<br>μ <sub>3</sub><br>2.150        | μ <sub>1,5</sub><br>Co–NC<br>159.9<br>159.9<br>μ <sub>3</sub><br>120.6<br>120.6 | 117.1<br>117.1                 | 5.9187                                          | Θ = 24.5 K<br>hysteresis in magnetisation<br>with a coercive field of 538 Oe.<br>spin-canted antiferromagnet    | [5]  |
| [Co(dca) <sub>2</sub> ] <sub>n</sub>                       | –                             | μ <sub>1,5</sub><br>2.096<br>2.096<br>μ <sub>3</sub><br>2.153        | 159.9                                                                           | 117.3                          | 5.9231                                          | C = 2.82 cm <sup>3</sup> mol <sup>−1</sup> K<br>θ = 9.7(6) K<br>T <sub>c</sub> = 9.7(2) K<br>mean-field magnets | [8]  |
| {bzBuNH <sub>3</sub> [Co(dca) <sub>3</sub> ]} <sub>n</sub> | –                             | 2.159<br>2.185                                                       | 174.9<br>179.6                                                                  | 126.3<br>127.9(4)              | 8.806                                           | C = 3.27 cm <sup>3</sup> mol <sup>−1</sup> K<br>Θ= − 30.8 K                                                     | [16] |



[illegible]

|                                                                                                                                |                                                |                                                |                                  |                               |                          |                                                                                                                                                                                                                    |      |
|--------------------------------------------------------------------------------------------------------------------------------|------------------------------------------------|------------------------------------------------|----------------------------------|-------------------------------|--------------------------|--------------------------------------------------------------------------------------------------------------------------------------------------------------------------------------------------------------------|------|
| $\{[\text{Co}(\text{bipim})(\text{dca})](\text{dca})\}_n$                                                                      | 2.187(2)<br>2.187(2)<br>2.137(2)<br>2.137(2)   | 2.074(3)<br>2.056(3)                           | 152.8(2)<br>171.3(2)             | 171.3(2)                      | 8.2321(4)<br>(5.7345(4)) | $\chi_{\text{MT}} = 2.64 \text{ cm}^3\text{mol}^{-1}\text{K}$ at 300 K<br>$\chi_{\text{MT}} = 0.03 \text{ cm}^3\text{mol}^{-1}\text{K}$ at 2 K<br>$J = -7.22 \text{ cm}^{-1}$<br>$zJ = -0.15 \text{ cm}^{-1}$      | [2]  |
| $\{[\text{Co}(\text{bipim})(\text{dca})]_2 \cdot (\text{ClO}_4)_2 \cdot (\text{CH}_3\text{OH})_2 \cdot \text{H}_2\text{O}\}_n$ | 2.139(3)<br>2.145(5)<br>2.163(3)<br>2.184(4)   | 2.044(4)<br>2.077(5)                           | 162.9(5)<br>170.8(4)             | 123.1(5)                      | 7.8407(8)<br>(5.7372(9)) | $\chi_{\text{MT}} = 2.75 \text{ cm}^3\text{mol}^{-1}\text{K}$ at 300 K<br>$\chi_{\text{MT}} = 0.03 \text{ cm}^3\text{mol}^{-1}\text{K}$ at 2 K<br>$J = -7.11 \text{ cm}^{-1}$<br>$zJ = -0.11 \text{ cm}^{-1}$      | [2]  |
| $\{[\text{Co}(\text{bpe})_2(\text{dca})](\text{dca})_2 \cdot 4\text{H}_2\text{O}\}_n$                                          | 2.149<br>2.149<br>2.189<br>2.189               | 2.113<br>2.113                                 | 167.6<br>167.6                   | 125(1)                        | 8.7093<br>(13.6302)      | undiscussed                                                                                                                                                                                                        | [4]  |
| $[\text{Co}(\text{dbtp})(\text{dca})_2]_n$                                                                                     | Co1<br>2.136<br>2.136<br>Co2<br>2.195<br>2.195 | Co1<br>2.154<br>2.154<br>Co2<br>2.110<br>2.087 | 134.8<br>134.8<br>163.5<br>162.7 | 123.7(8)<br>115.2(8)<br>164.3 | 7.6751<br>(9.845(1))     | $\mu_{\text{eff}} = 4.62 \mu_{\text{B}}$ at 300K<br>$\mu_{\text{eff}} = 3.16 \mu_{\text{B}}$ at 4K<br>weak antiferromagnetic coupling<br>no long range ordering                                                    | [7]  |
| $\{[\text{Co}(\text{bte})(\text{dca})_2] \cdot \text{H}_2\text{O}\}_n$                                                         | 2.139(2)<br>2.125(2)                           | 2.091(2)<br>2.128(2)<br>2.128(2)<br>2.142(2)   | 163.0(2)<br>146.2(2)             | 122.9(3)                      | 7.858(2)<br>(6.809(1))   | $\chi_{\text{MT}} = 3.05\text{--}3.11$ at 100-300 K<br>$\chi_{\text{MT}} = 1.39$ at 2 K<br>weak antiferromagnetic coupling<br>no long range ordering                                                               | [10] |
| $[\text{Co}(\text{bpeado})(\text{dca})_2]_n$                                                                                   | 2.082<br>2.082                                 | 2.119<br>2.119<br>2.134<br>2.134               | 172.6<br>170.4                   |                               | 8.1489<br>(14.0137)      | antiferromagnetic interaction transported by dca or bpeado<br>$\chi_{\text{MT}} = 3.26 \text{ cm}^3\text{mol}^{-1}\text{K}$ at 300 K<br>$\Theta = -13.4\text{K}$<br>$C = 3.34 \text{ cm}^3\text{mol}^{-1}\text{K}$ | [14] |
| $[\text{Co}(\text{bpy})(\text{dca})_2]_n$                                                                                      | 2.158<br>2.158                                 | 2.144<br>2.113                                 | 158.85<br>151.30                 | 116.24<br>113.87              | 8.556<br>(11.4251)       | undiscussed                                                                                                                                                                                                        | [15] |

|                                                                                                                       |                      |                                              |                                              |                      |           |                                                                                                                                        |      |
|-----------------------------------------------------------------------------------------------------------------------|----------------------|----------------------------------------------|----------------------------------------------|----------------------|-----------|----------------------------------------------------------------------------------------------------------------------------------------|------|
|                                                                                                                       |                      | 2.112<br>2.122                               | 178.52<br>173.29                             |                      |           |                                                                                                                                        |      |
| [Co(bipy)(dca) <sub>2</sub> ·0.5H <sub>2</sub> O·0.5MeOH] <sub>n</sub>                                                | 2.138<br>2.138       | 2.111<br>2.111<br>2.118<br>2.118             | 158.7<br>142.4                               | 118.5(2)<br>118.5(2) | 7.3249    | very weak antiferromagnetic coupling<br>Θ = -13 K<br>C = 3.32 cm <sup>3</sup> mol <sup>-1</sup> K                                      | [30] |
| Single dca as a linker                                                                                                |                      |                                              |                                              |                      |           |                                                                                                                                        |      |
| [Co(phpyk)(dca) <sub>2</sub> ] <sub>n</sub>                                                                           | 2.128(2)<br>2.207(1) | 2.059(2)<br>2.079(2)<br>2.081(2)<br>2.138(2) | 173.9(2)<br>175.2(2)<br>164.0(2)<br>150.3(2) | 123.0(2)<br>122.1(2) | 8.1236(3) | undiscussed                                                                                                                            | [3]  |
| [Co(tmeda)(dca) <sub>2</sub> ] <sub>n</sub>                                                                           | 2.225<br>2.225       | 2.099<br>2.112                               | 165.5<br>175.2                               | 122.1                | 7.463     | antiferromagnetic coupling                                                                                                             | [12] |
| {[Co(deen)(dca) <sub>2</sub> ] <sub>n</sub>                                                                           | 2.190(2)<br>2.250(2) | 2.122(2)<br>2.062(2)<br>2.155(1)<br>2.145(2) | 168.9(2)<br>177.7(2)<br>161.7(2)             | 119.8(2)<br>121.4(2) | 7.9457(3) | χ <sub>M</sub> T = 1.63 cm <sup>3</sup> mol <sup>-1</sup> K at 300 K<br>Θ = - 4.755 K<br>C = 3.988 cm <sup>3</sup> mol <sup>-1</sup> K | [13] |
| Cubane-like structure                                                                                                 |                      |                                              |                                              |                      |           |                                                                                                                                        |      |
| [Co <sub>4</sub> (CH <sub>3</sub> O) <sub>4</sub> (CH <sub>3</sub> OH) <sub>4</sub> (dca) <sub>4</sub> ] <sub>n</sub> | –                    | 2.100(5)<br>2.134(4)                         | 154.3(4)<br>166.0(5)                         | 117.7(5)             | 7.2780(9) | ac<br>no λ <sub>M</sub> '' signal in external field                                                                                    | [11] |

**TPrA** = tetrapropylammonium cation; **bipim** = 2,2-bipyrimidine; **phpyk** = 2-benzoylpyridine; **dbtp** = 1,3-di(benzotriazol-1 yl)propane; **tmeda** = tetramethylethylenediamine; **deen** = N,N-diethyl-ethylenediamine; **bpeado** = 1,2-bis(4-pyridyl)ethane-N,N'-dioxide; **bzBuNH<sub>3</sub>** = benzyltributylammonium; **MV<sup>2+</sup>** = methylviologen dication; **bipy** = 4,4'-bipyridine

#### References for 3D Co(II) coordination polymers:

1. Bermudez-Garcia, J. M.; Sanchez-Andujar, M.; Yanez-Vilar, S.; Castro-Garcia, S.; Artiaga, R.; Lopez-Beceiro, J.; Botana, L.; Alegriade, A.; Senaris-Rodriguez, M. A. Multiple phase and dielectric transitions on a novel multi-sensitive [TPrA][M(dca)<sub>3</sub>] (M: Fe<sup>2+</sup>, Co<sup>2+</sup> and Ni<sup>2+</sup>) hybrid inorganic–organic perovskite family. *J. Mater. Chem. C* **2016**, 4, 4889–4898.

2. Chen, C.W.; Wei, H.H.; Lee, C.J. Two New 3D Networks Co(II) Complexes Constructed *via* the Bridging Dicyanamide and 2,2-Bipyrimidine Ligands: Structures and Magnetic Properties. *J. Chin. Chem. Soc.* **2006**, *53*, 1291–1296.
3. Ghosh, T.; Chattopadhyay, T.; Das, S.; Mondal, S.; Suresh, E.; Zangrando, E.; Das, D. Thiocyanate and Dicyanamide Anion Controlled Nuclearity in Mn, Co, Ni, Cu, and Zn Metal Complexes with Hemilabile Ligand 2-Benzoylpyridine. *Cryst. Growth Des.* **2011**, *11*, 3198–3205.
4. Halder, R.; Maji, T. K. Selective carbon dioxide uptake and crystal-to-crystal transformation: porous 3D framework to 1D chain triggered by conformational change of the spacer. *CrystEngComm* **2012**, *14*, 684–690.
5. Jensen, P.; Batten, S. R.; Fallon, G. D.; Moubaraki, B.; Murray, K. S.; Price, D. J. Structural isomers of  $M(dca)_2$  molecule-based magnets. Crystal structure of tetrahedrally coordinated sheet-like  $\beta$ -Zn(dca)<sub>2</sub> and  $\beta$ -Co/Zn(dca)<sub>2</sub>, and the octahedrally coordinated rutile-like  $\alpha$ -Co(dca)<sub>2</sub>, where dca<sup>-</sup> = dicyanamide, N(CN)<sub>2</sub><sup>-</sup>, and magnetism of  $\beta$ -Co(dca)<sub>2</sub>. *Chem. Commun.* **1999**, 177–178.
6. Jones, L.F.; O'Dea, L.; Offermann, D. A.; Jensen, P.; Moubaraki, B.; Murray, K. S. Benzotriazole based 1-D, 2-D and 3-D metal dicyanamide and tricyanomethanide coordination networks. *Polyhedron* **2006**, *25*, 360–372.
7. Kurmoo, M.; Kepert, C. J. Hard magnets based on transition metal complexes with the dicyanamide anion, {N(CN)<sub>2</sub>}<sup>-</sup>. *N. J. Chem.* **1998**, 1515–1524.
8. 10. Li, B.-L.; Wang, X.-Y.; Zhu, X.; Gao, S.; Zhang, Y. Synthesis, crystal structure and magnetic behavior of two cobalt coordination polymers with 1,2-bis(1,2,4-triazol-1-yl)ethane and dicyanamide. *Polyhedron* **2007**, *26*, 5219–5224.
9. Lin, Z.; Li, Z.; Zhang, H. Syntheses, Structures, and Magnetic Properties of Two Novel Three-Dimensional Frameworks Built from M<sub>4</sub>O<sub>4</sub> Cubanes and Dicyanamide Bridges. *Cryst. Growth. Des.* **2007**, *7*, 589–591.
10. J. Luo, X.-G. Zhou, S. Gao, L.-H. Weng, Z.-H. Shao, C.-M. Zhang, Y.-R. Li, J. Zhang, R.-F. Cai, Syntheses, structures and magnetic properties of two novel 3D helical dicyanamide complexes containing polyamine ligand. *Inorg. Chem. Commun.* **2004**, *7*, 669–672.
11. Mal, D.; Sen, R.; Rentschler, E.; Okamoto, K.; Miyashita, Y.; Koner, S. Fully interlocked three-dimensional molecular scaffolding: Synthesis, X-ray structure, magnetic and nitrogen sorption study. *Inorg. Chim. Acta* **2012**, *385*, 27–30.
12. Sun, H.-L.; Gao, S.; Ma, B.-Q.; Batten, S.R. 3D Self-penetrating coordination network constructed by dicyanamide and 1,2-bis(4-pyridyl)ethane-N,N'-dioxide (bpeado). *CrystEngComm* **2004**, *6*(94), 579–583.
13. Sun, B.-W.; Gao, S.; Ma, B.-Q.; Wang, Z.-M. N. A two-fold interpenetrated three-dimensional cobalt(II) complex with dual dicyanamide and 4,4'-bipyridine bridges. *New J. Chem.* **2000**, *24*, 953–954.
14. Tong, M.L.; Ru, J.; Wu, Y.M.; Chen, X.-M.; Chang, H.-C.; Mochizuki, K.; Kitagawa, S. Cation-templated construction of three-dimensional  $\alpha$ -Po cubic-type  $[M(dca)_3]$  networks. Syntheses, structures and magnetic properties of  $A[M(dca)_3]$  (dca = dicyanamide; for A = benzyltributylammonium, M = Mn<sup>2+</sup>, Co<sup>2+</sup>; for A = benzyltriethylammonium, M = Mn<sup>2+</sup>, Fe<sup>2+</sup>). *New J. Chem.* **2003**, *27*, 779–782.

15. van der Werff, P. M.; Martinez-Ferrero, E.; Batten, S.R; Jensen, P.; Ruiz-Perez, C.; Almeida, M.; Waerenborgh, J. C.; Cashion, J. D.; Moubaraki, B.; Gal'an-Mascaros, J. R.; Martinez-Agudo, J. M.; Coronado, E.; Murray, K. S. Hybrid materials containing organometallic cations and 3-D anionic metal dicyanamide networks of type  $[\text{Cp}^*\text{2M}][\text{M}'(\text{dca})_3]$ . *Dalton Trans.* **2005**, 285–290.
16. van der Werff, P. M.; Batten, S.R.; Jensen, P.; Moubaraki, B.; Murray, K. S.; Cashion, J. D. Structure and Magnetism of 3D Anionic Metal Dicyanamide  $(\text{MePh}_3\text{P})[\text{M}(\text{dca})_3](\text{M})$  Fe, Co, Ni) and  $(\text{EtPh}_3\text{P})[\text{M}(\text{dca})_3](\text{M})$  Mn, Co, Ni) Networks. *Cryst.Growth&Des.* **2004**, 4, 503-508.
17. Wu, L.N.; He, M. Q.; Li, M.X.; Nfor, E.N.; Wang, Z. X. Inorganic-organic hybrid materials with methylviologen dication confined in magnetic hosts: Synthesis, crystal structures and magnetic properties. *Inorg. Chem. Commun.* **2020**, 116, 107908.
18. Jensen, P.; Batten, S. R.; Moubaraki, B.; Murray, K. S. Syntheses, crystal structures, and magnetic properties of first row transition metal coordination polymers containing dicyanamide and 4,4-bipyridine. *J. Chem. Soc., Dalton Trans.* **2002**, 3712–3722.
